# Supplementary material
Source: PubMed Central journal article supplement (PMC5999039)

## Supporting information

Sequential photochemistry of dibenzo[*a,e*]dicyclopropa[*c,g*][8]annulene-1,6-dione:  
selective formation of didehydrodibenzo[*a,e*][8]annulenes with ultrafast SPAAC  
reactivity

Dewey A. Sutton, Vladimir V. Popik\*

Department of Chemistry, University of Georgia, Athens, GA 30602.

E-mail: [vpopik@uga.edu](mailto:vpopik@uga.edu)

### Table of contents:

|                        |    |
|------------------------|----|
| Kinetic Data .....     | S2 |
| MALDI-TOF spectra..... | S4 |
| NMR Spectra.....       | S6 |

**Table S.1** Observed rates of cycloaddition of **5a** with BuN<sub>3</sub> at 25°C.

| Azide Concentration (M) | $k_{\text{obs}}$ (s <sup>-1</sup> ) |          |          |
|-------------------------|-------------------------------------|----------|----------|
| 0.03                    | 5.121E-4                            | 4.763E-4 | 4.872E-4 |
| 0.04                    | 6.901E-4                            | 6.876E-4 | 6.779E-4 |
| 0.05                    | 7.966E-4                            | 7.566E-4 | 7.657E-4 |
| 0.1                     | 0.00162                             | 0.00160  | 0.00161  |
| 0.15                    | 0.00250                             | 0.00251  | 0.00247  |

**Table S2.** Observed rates of cycloaddition of **3a** with BuN<sub>3</sub> at 25°C.

| Azide Concentration (M) | $k_{\text{obs}}$ (s <sup>-1</sup> ) |         |         |
|-------------------------|-------------------------------------|---------|---------|
| 3x10 <sup>-4</sup>      | 0.01226                             | 0.01145 | 0.01235 |
| 4x10 <sup>-4</sup>      | 0.01442                             | 0.01610 | 0.01477 |
| 4.8x10 <sup>-4</sup>    | 0.01877                             | 0.01965 | 0.01965 |
| 6x10 <sup>-4</sup>      | 0.02173                             | 0.02155 | 0.0214  |
| 8x10 <sup>-4</sup>      | 0.02965                             | 0.02896 | 0.02934 |

**Table S.3** Observed rates of cycloaddition of **2a** with BuN<sub>3</sub> at 25°C.

| Azide Concentration (M) | $k_{\text{obs}}$ (s <sup>-1</sup> ) |         |         |
|-------------------------|-------------------------------------|---------|---------|
| 0.0151                  | 9.31E-4                             | 0.00104 | 0.00112 |
| 0.0252                  | 0.00172                             | 0.00176 | 0.00175 |
| 0.0378                  | 0.00243                             | 0.00269 | 0.00229 |
| 0.0503                  | 0.00301                             | 0.00331 | 0.00394 |
| 0.0755                  | 0.00513                             | 0.00461 | 0.00522 |

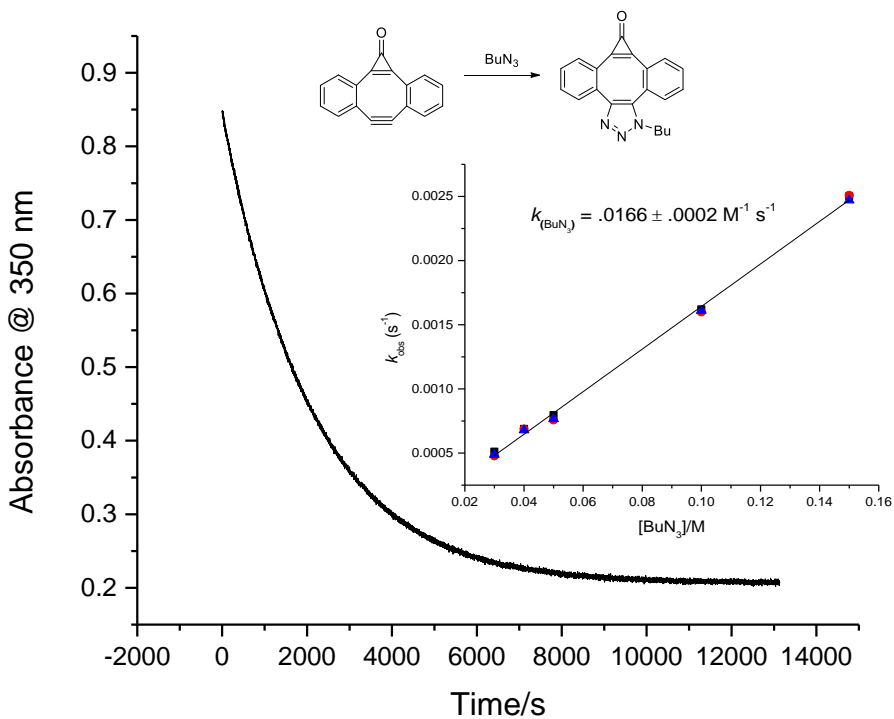

**Figure S1.** Reaction of 0.088 mM MC-DIBOD (5a) with butyl azide in 1:1 DCM/MeOH at 25°C.

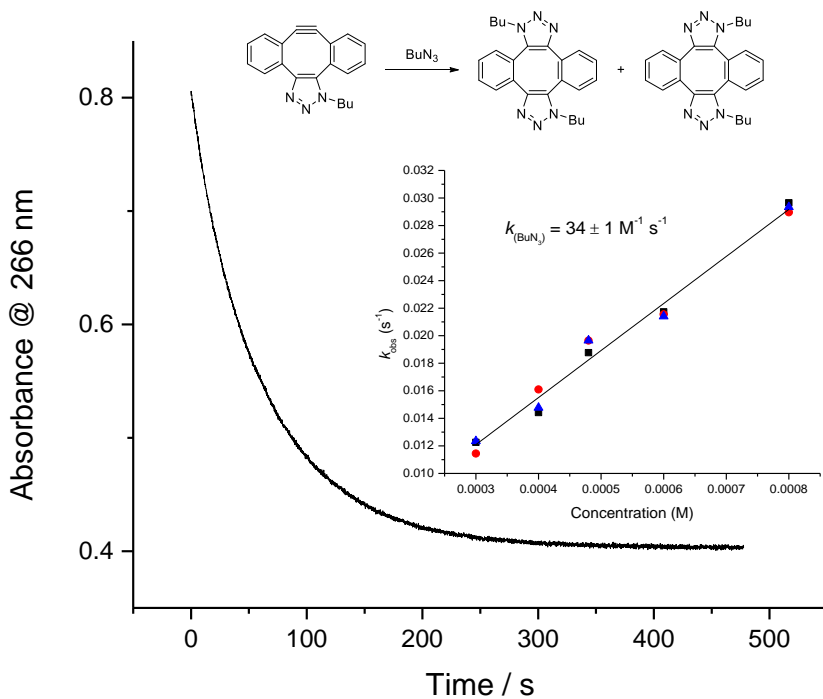

**Figure S2.** Reaction of 0.029 mM mono-triazole 3a with butyl azide in 1:1 DCM/MeOH at 25°C.

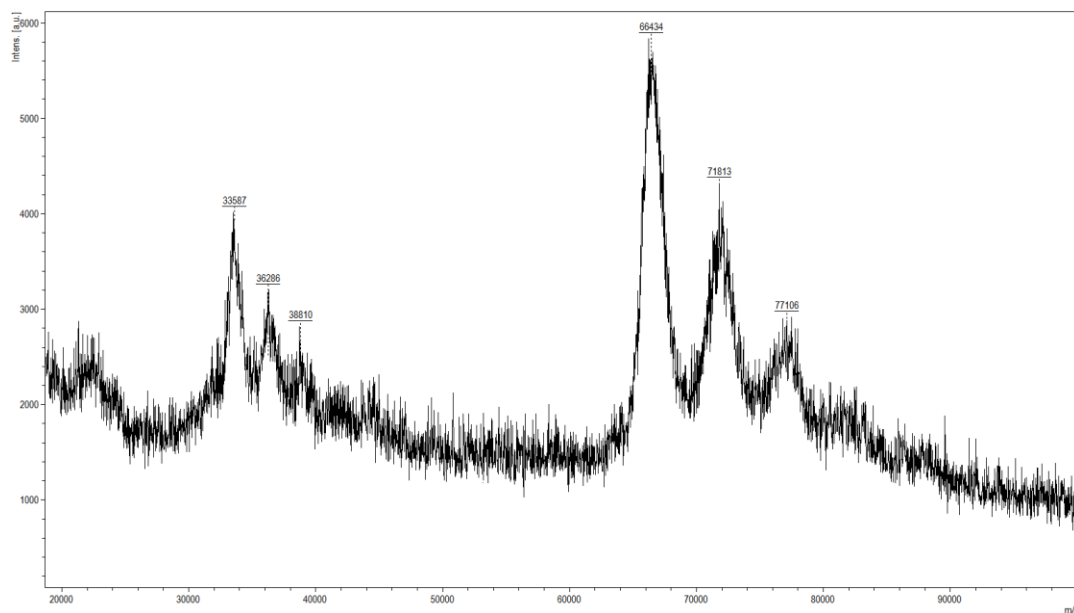

**Figure S3.** Photo-derivatization of azido-BSA-azide with PEG<sub>5000</sub>-azide using MC-DIBOD (**5a**).

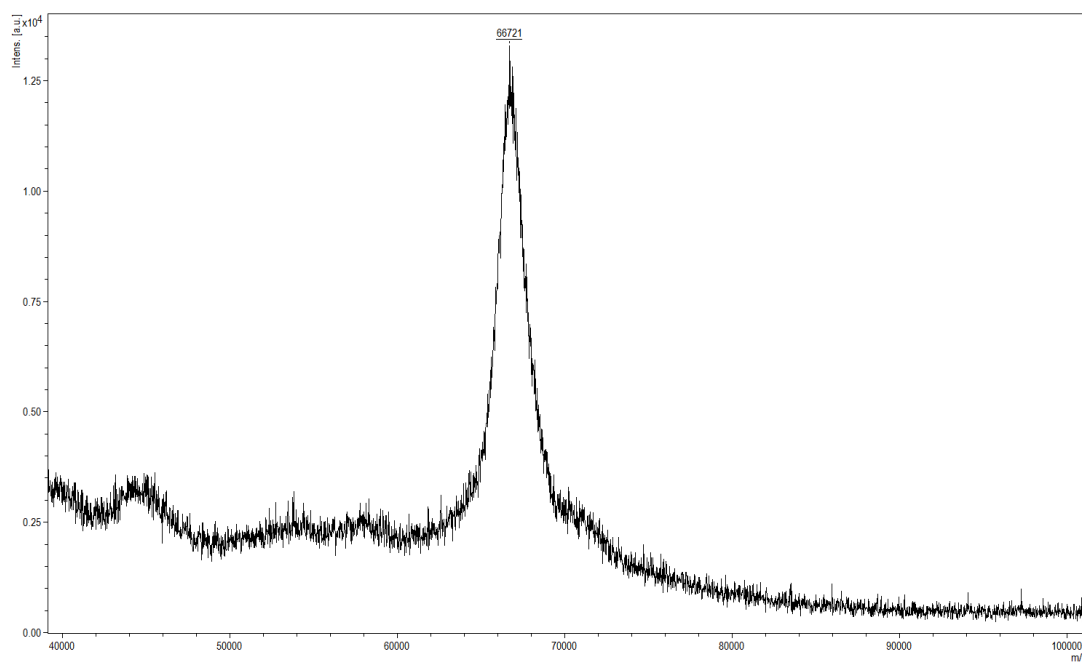

**Figure S4.** Dark control: azido-BSA-azide incubated with PEG<sub>5000</sub>-triazole and MC-DIBOD (**5a**) in the dark.

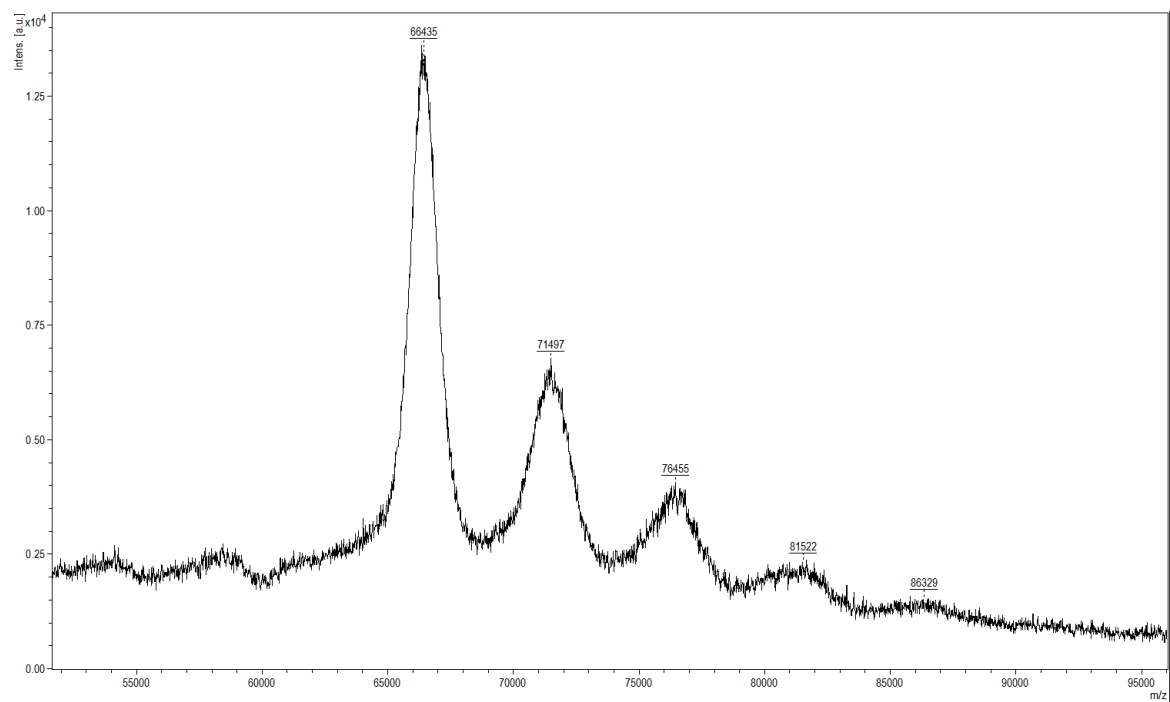

**Figure S5.** CuAAC-conjugation of azido-BSA with propargyl-PEG<sub>5000</sub>

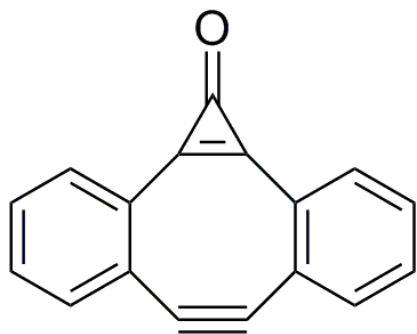

**5a**

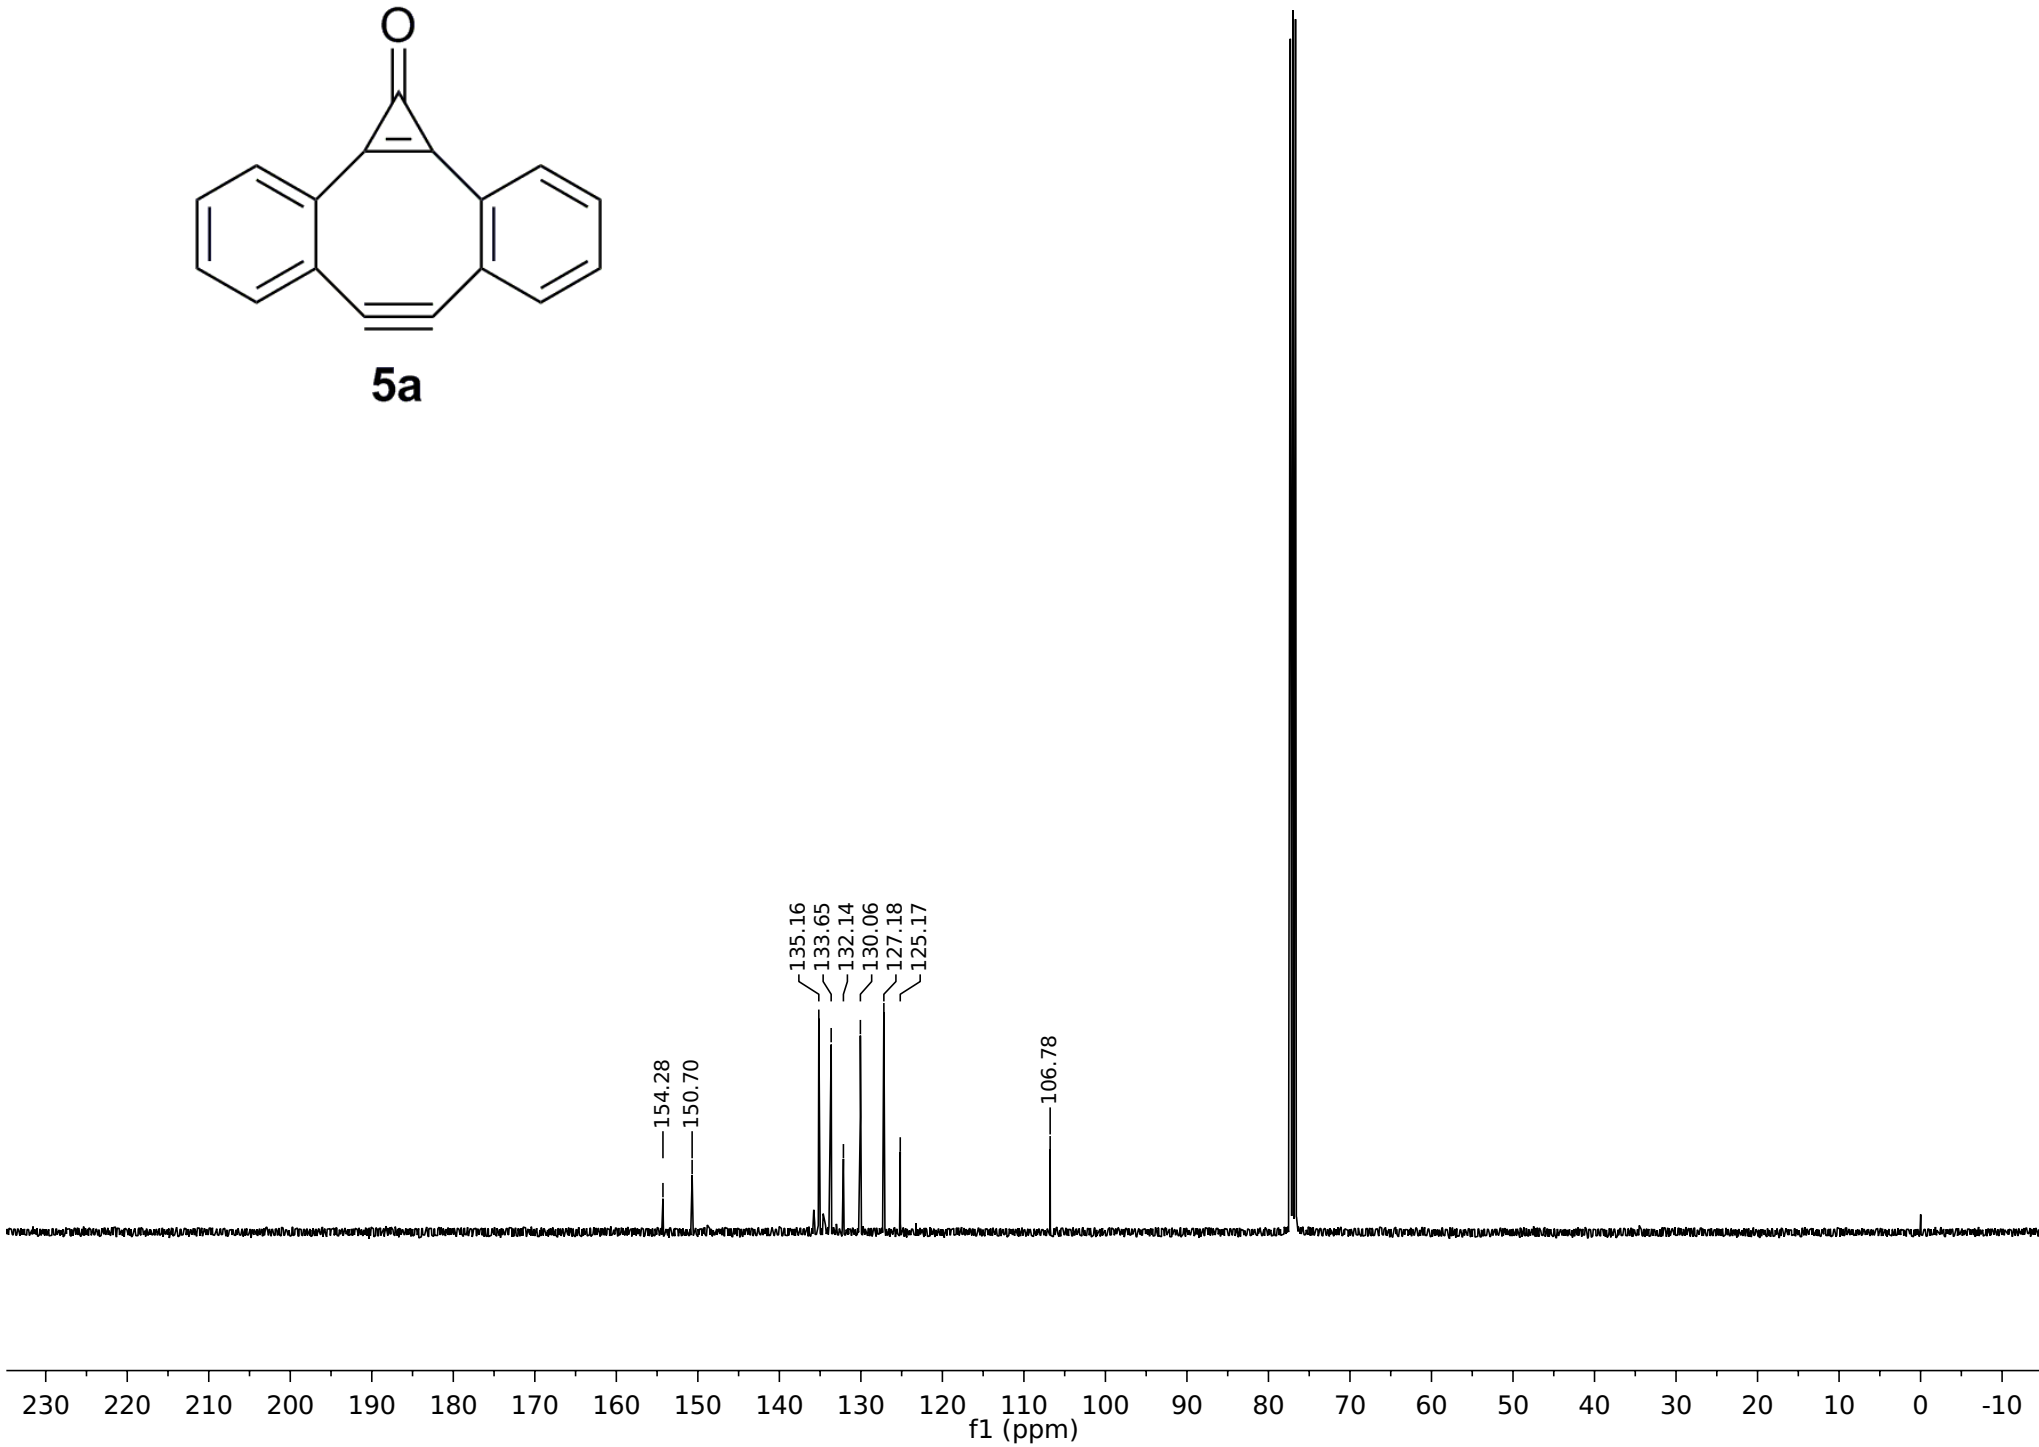

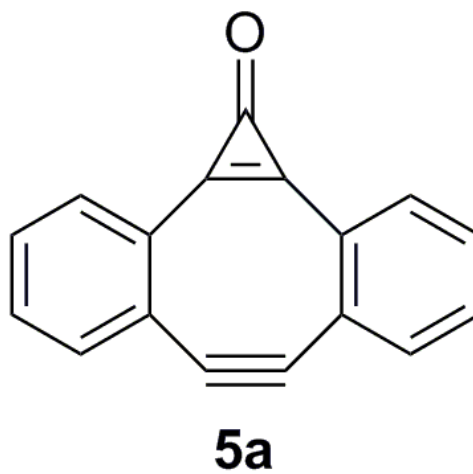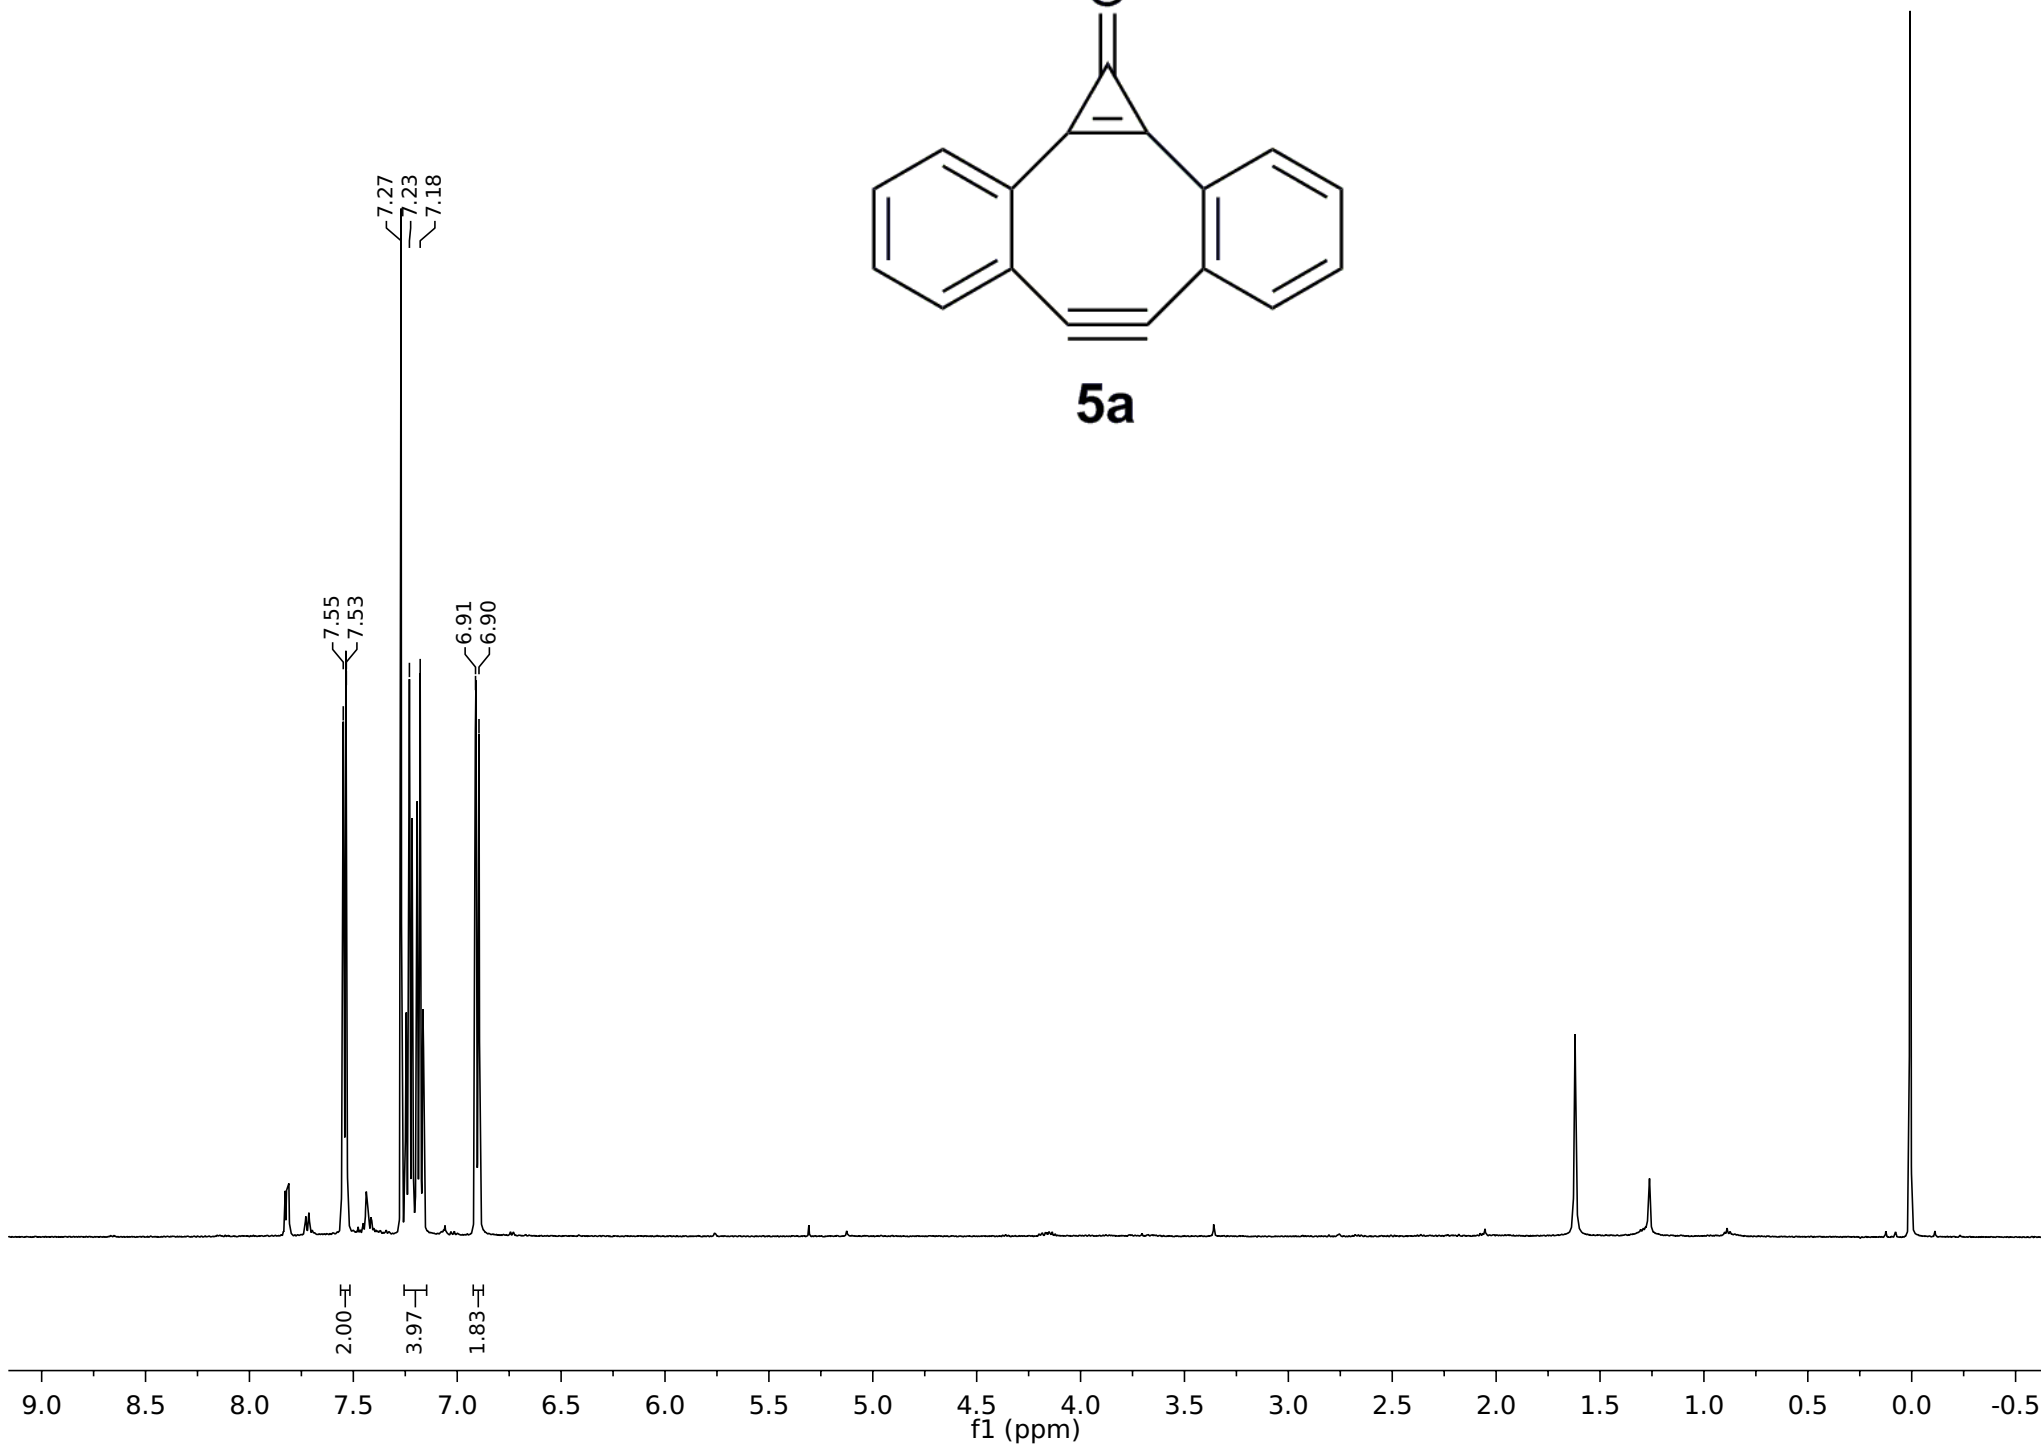

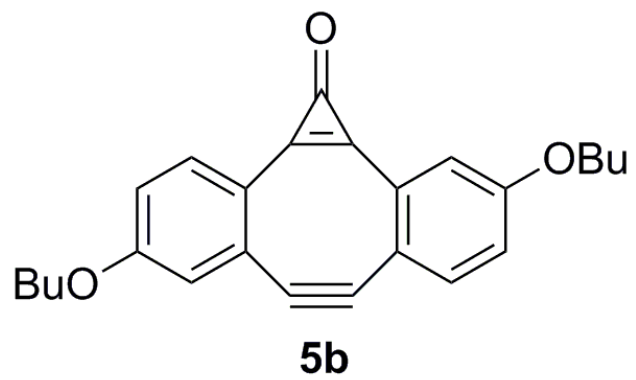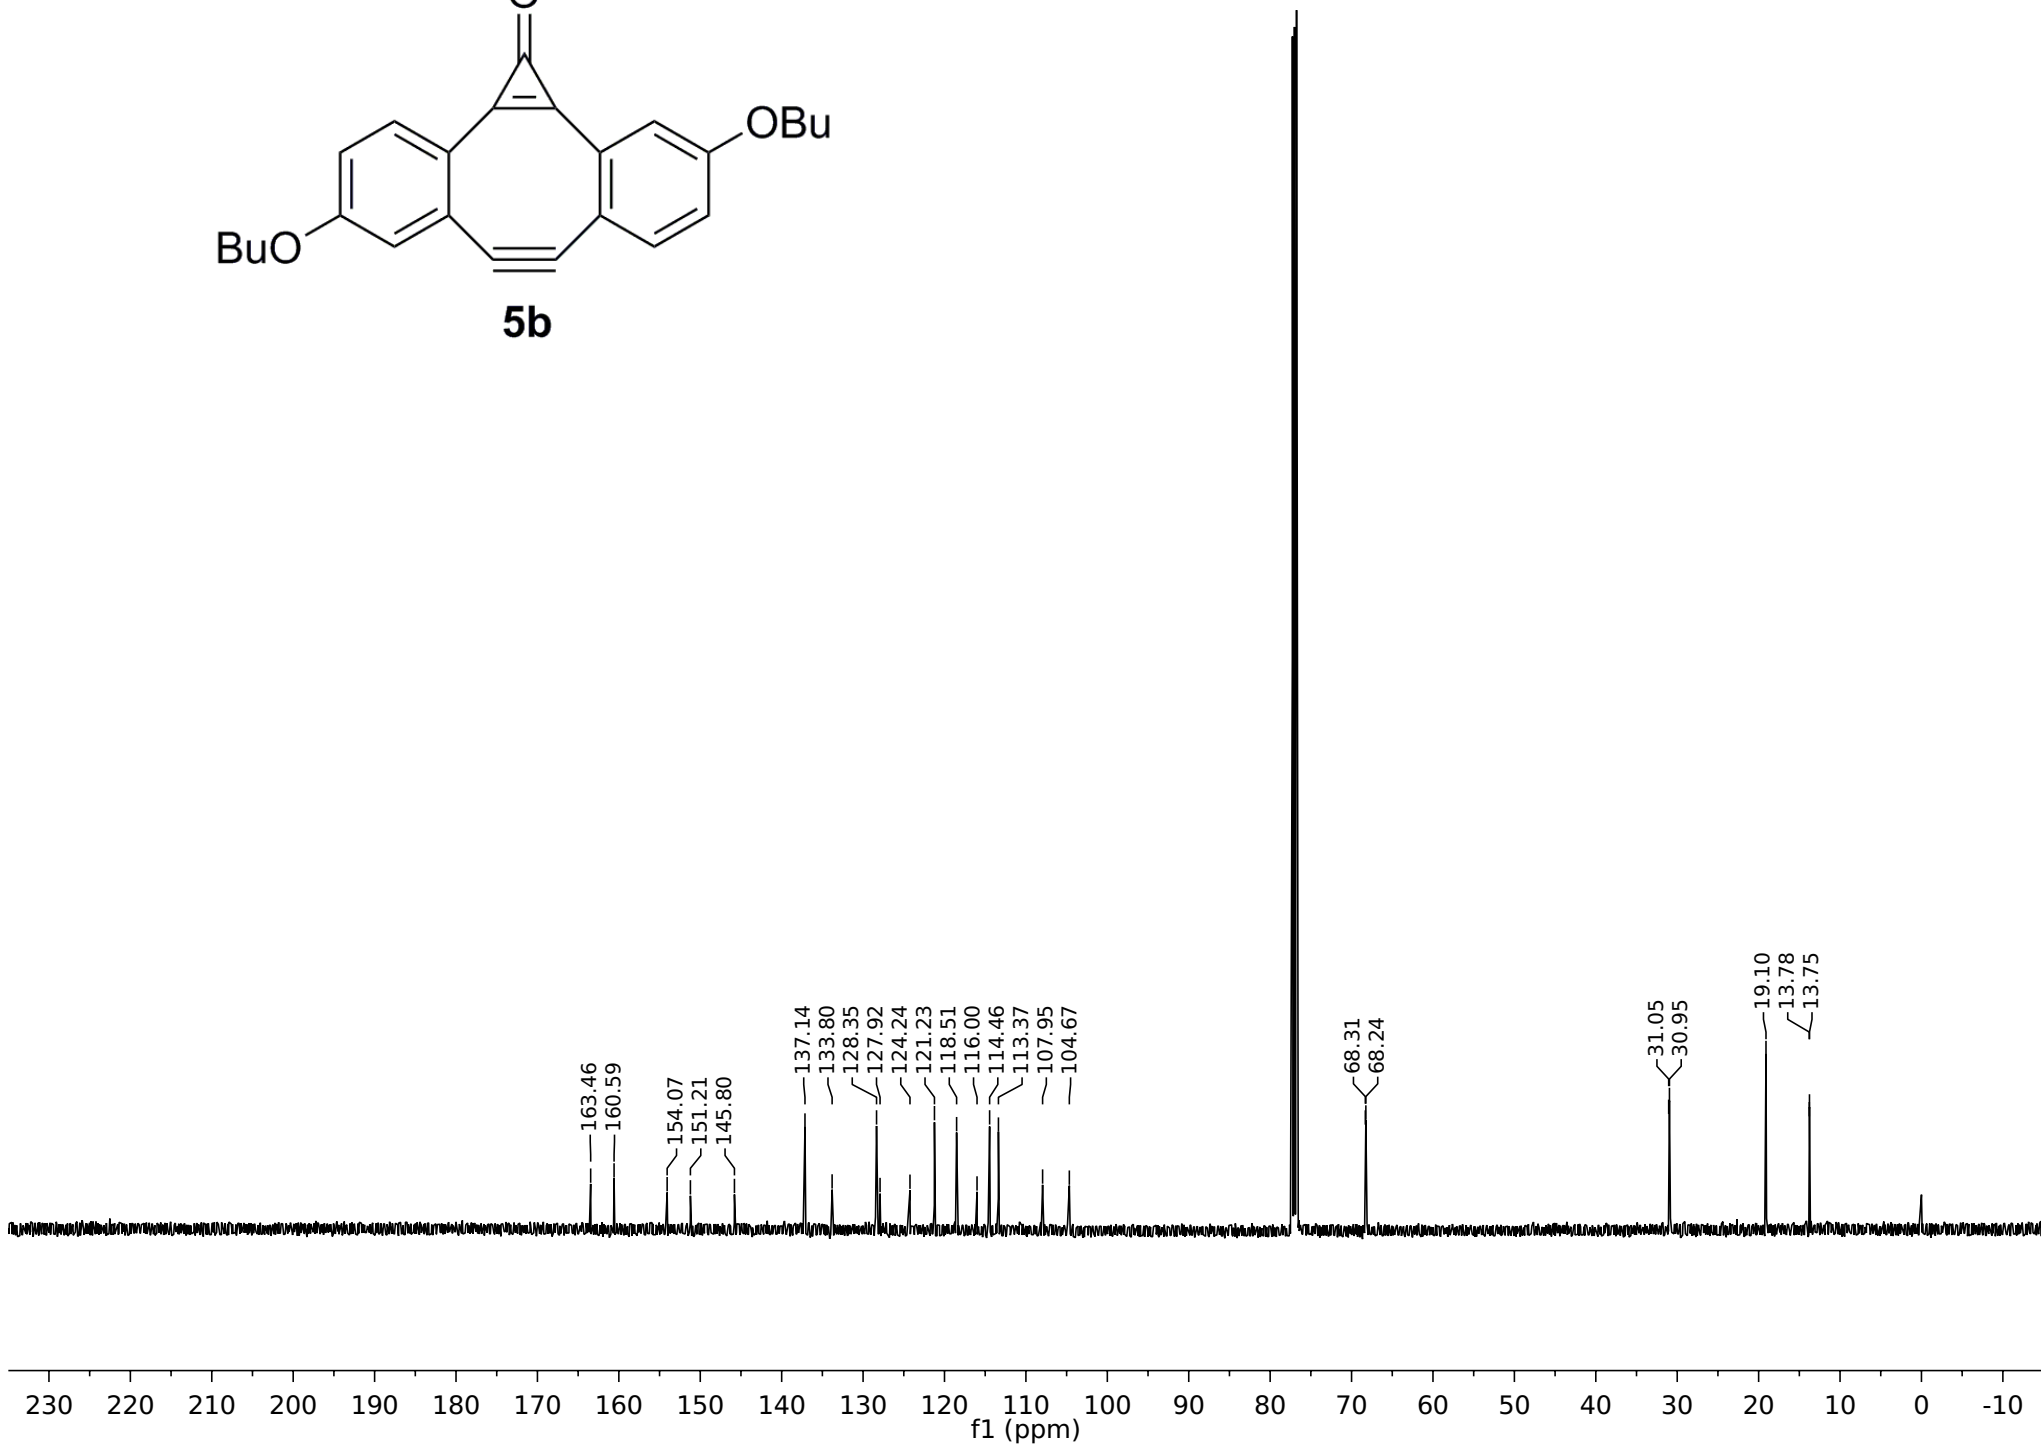



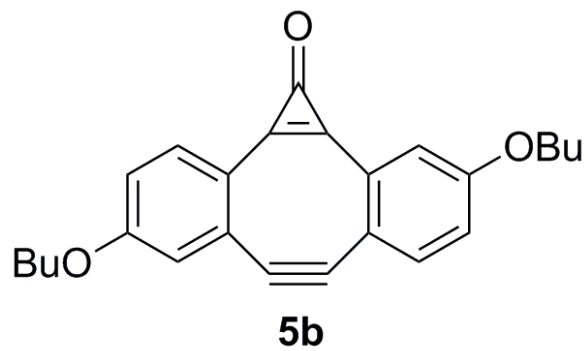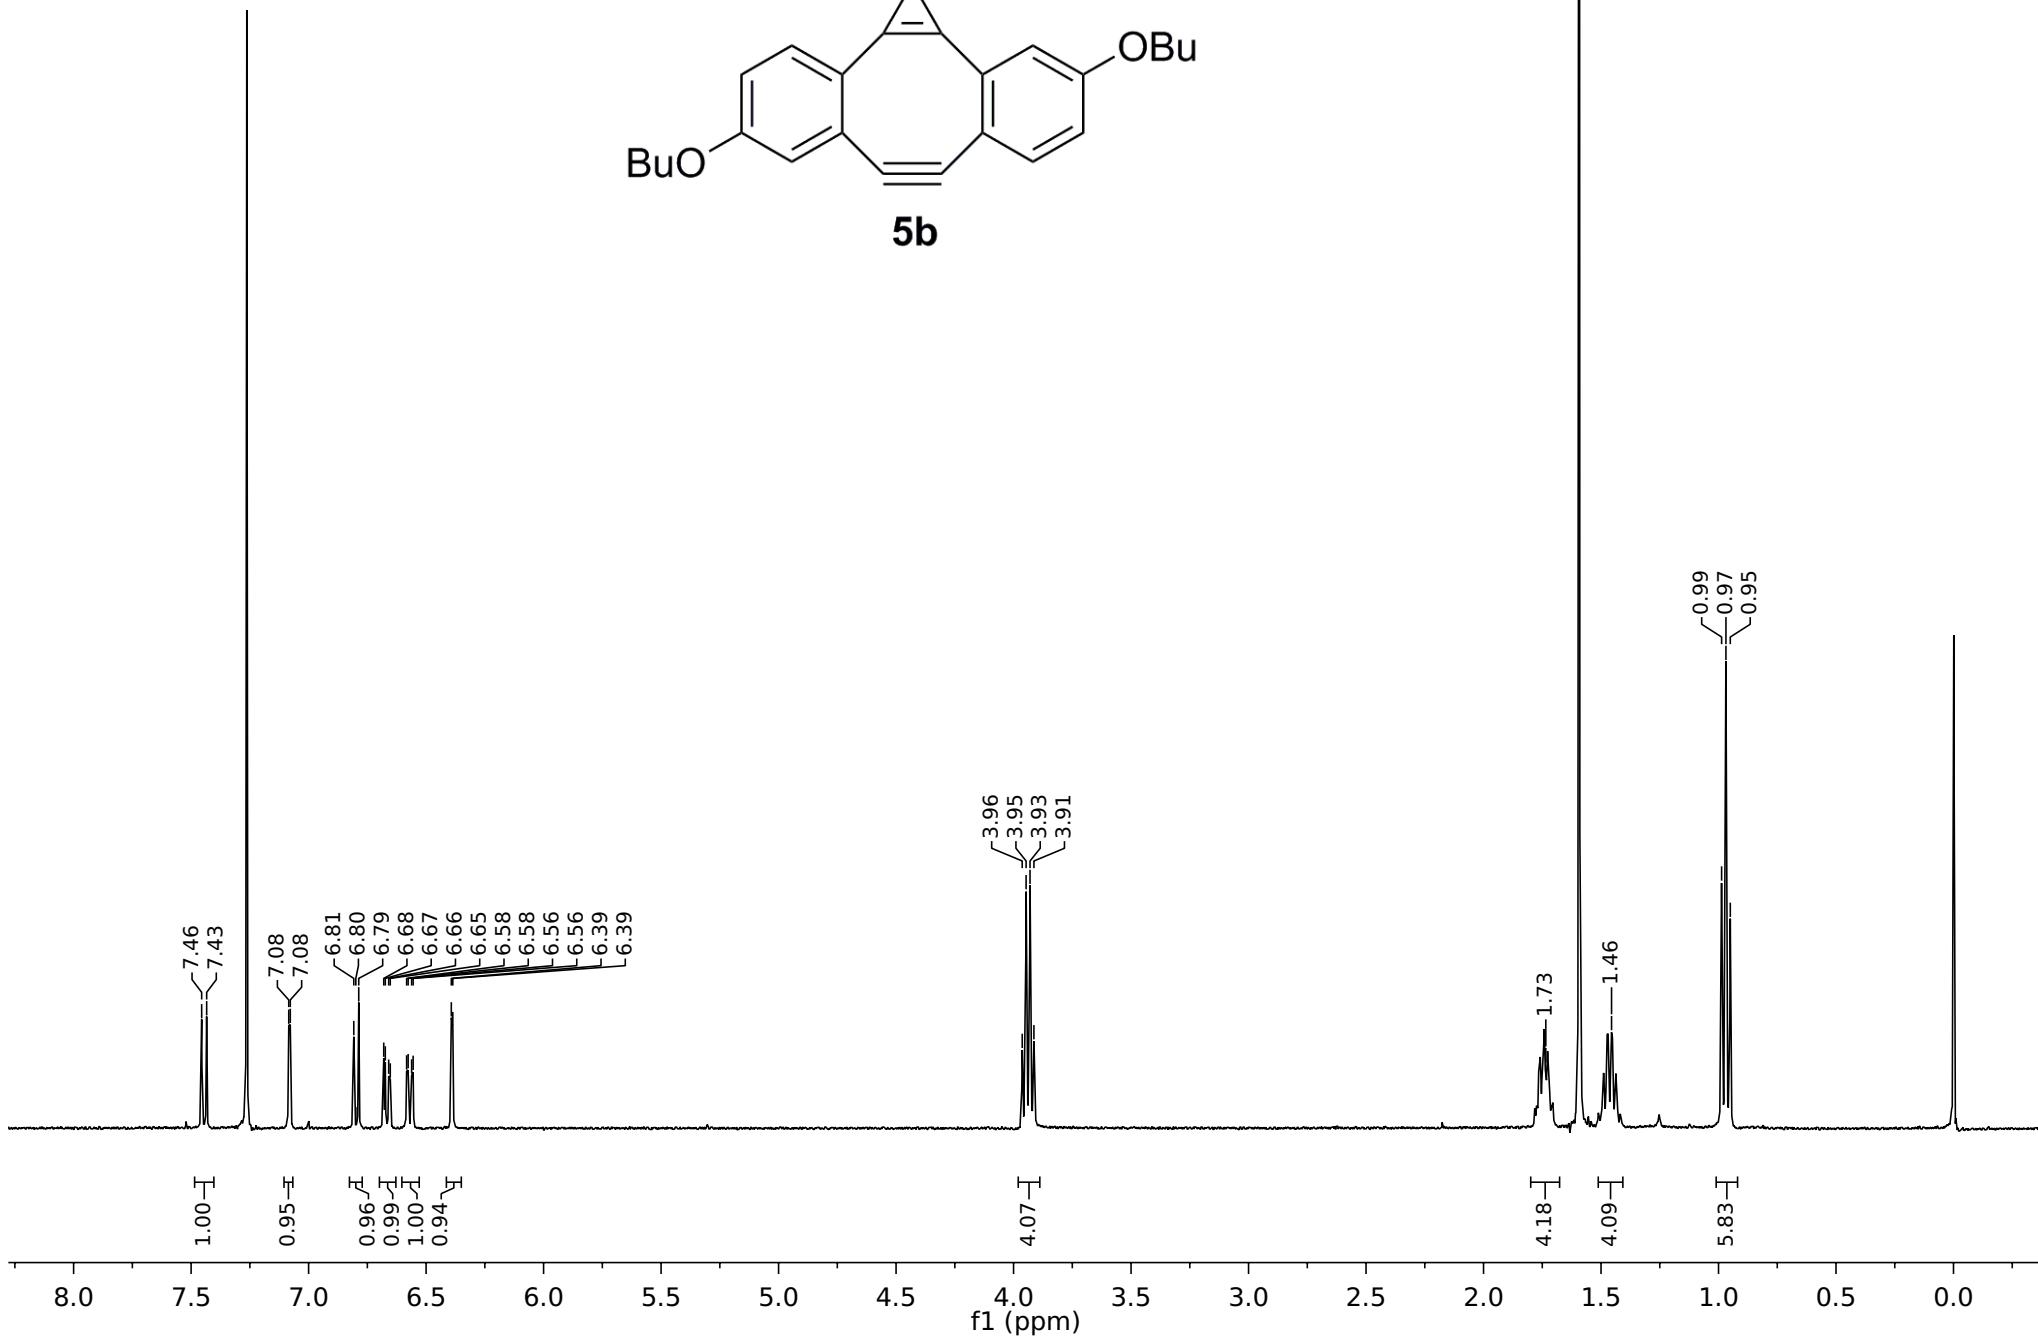

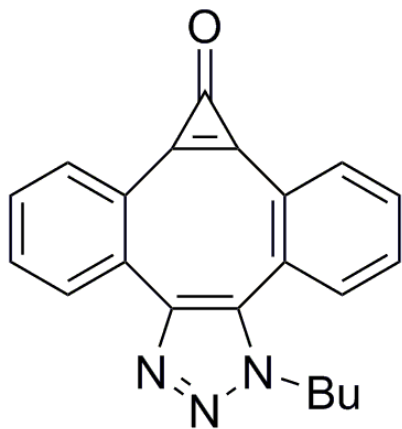

6a

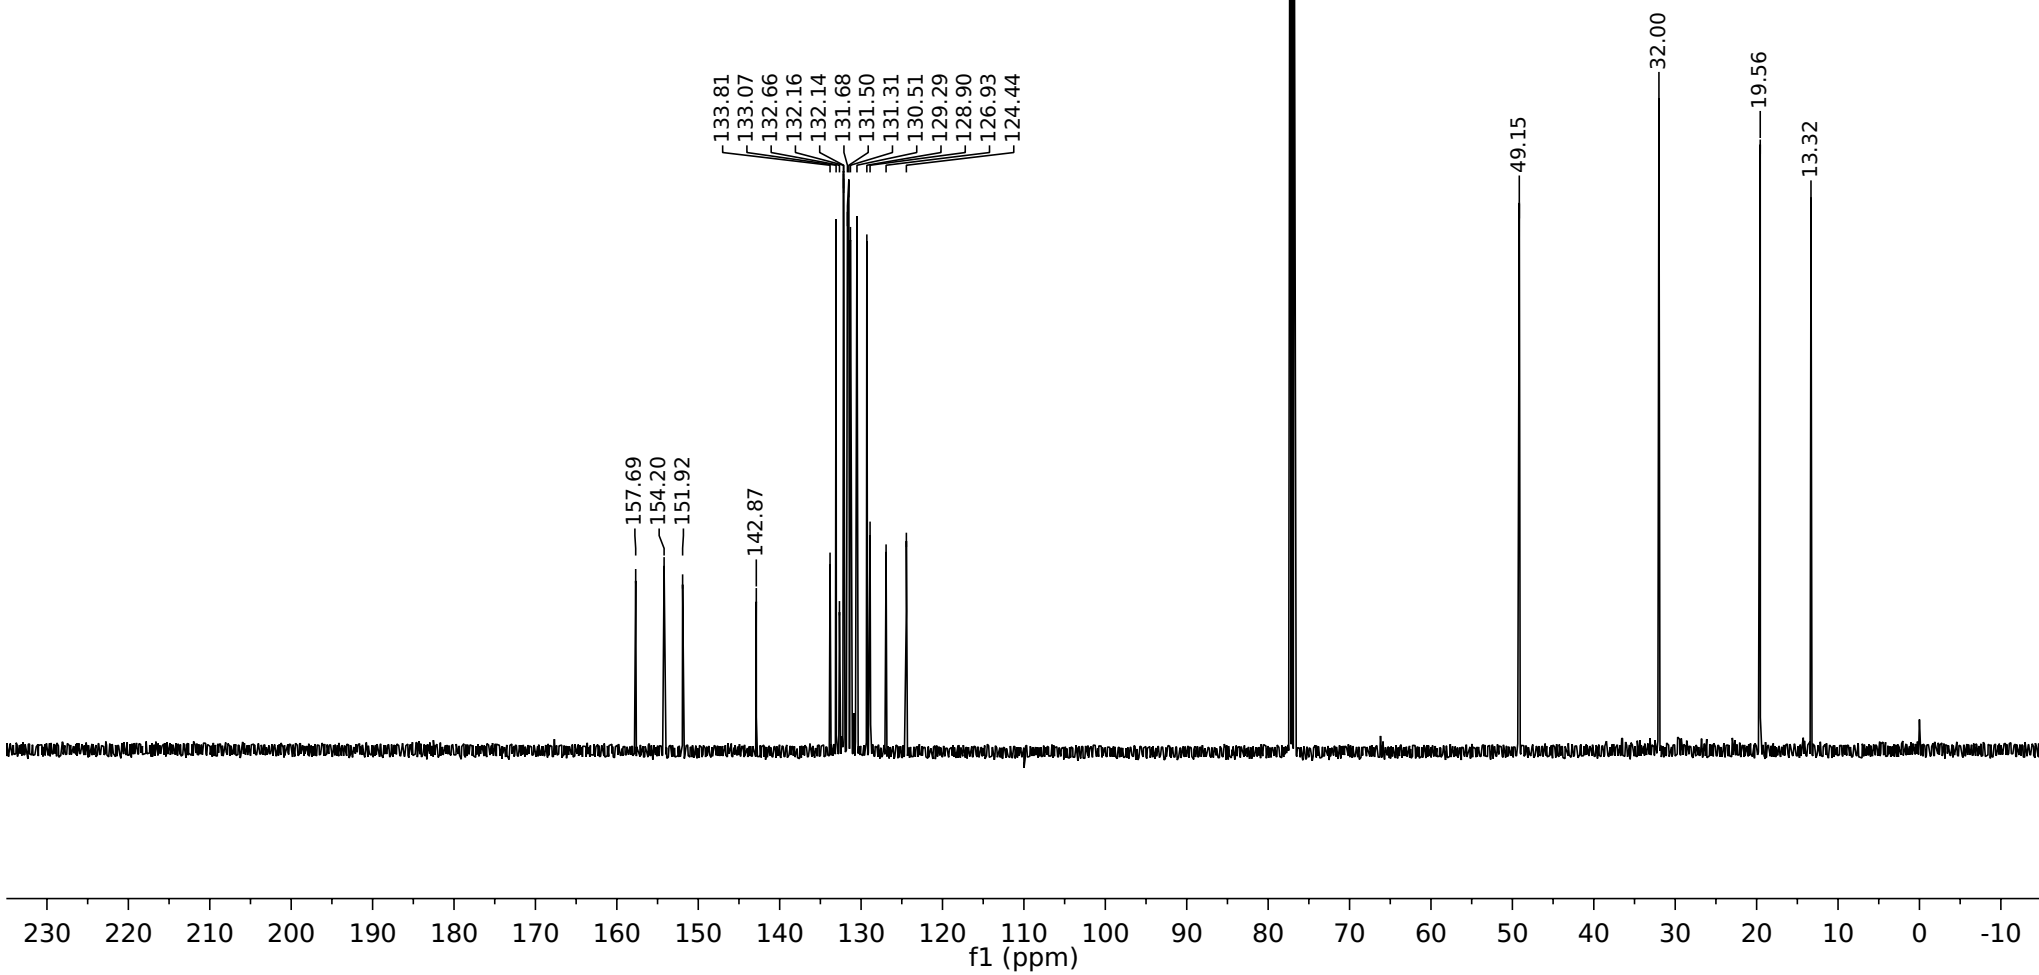

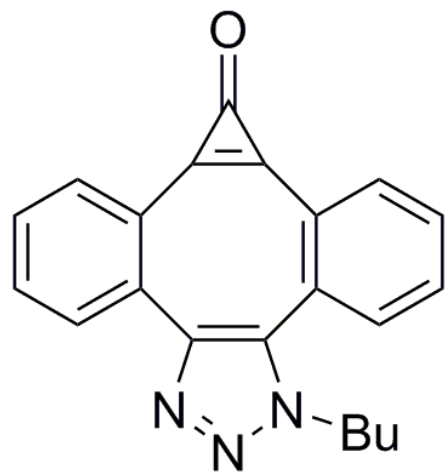

**6a**

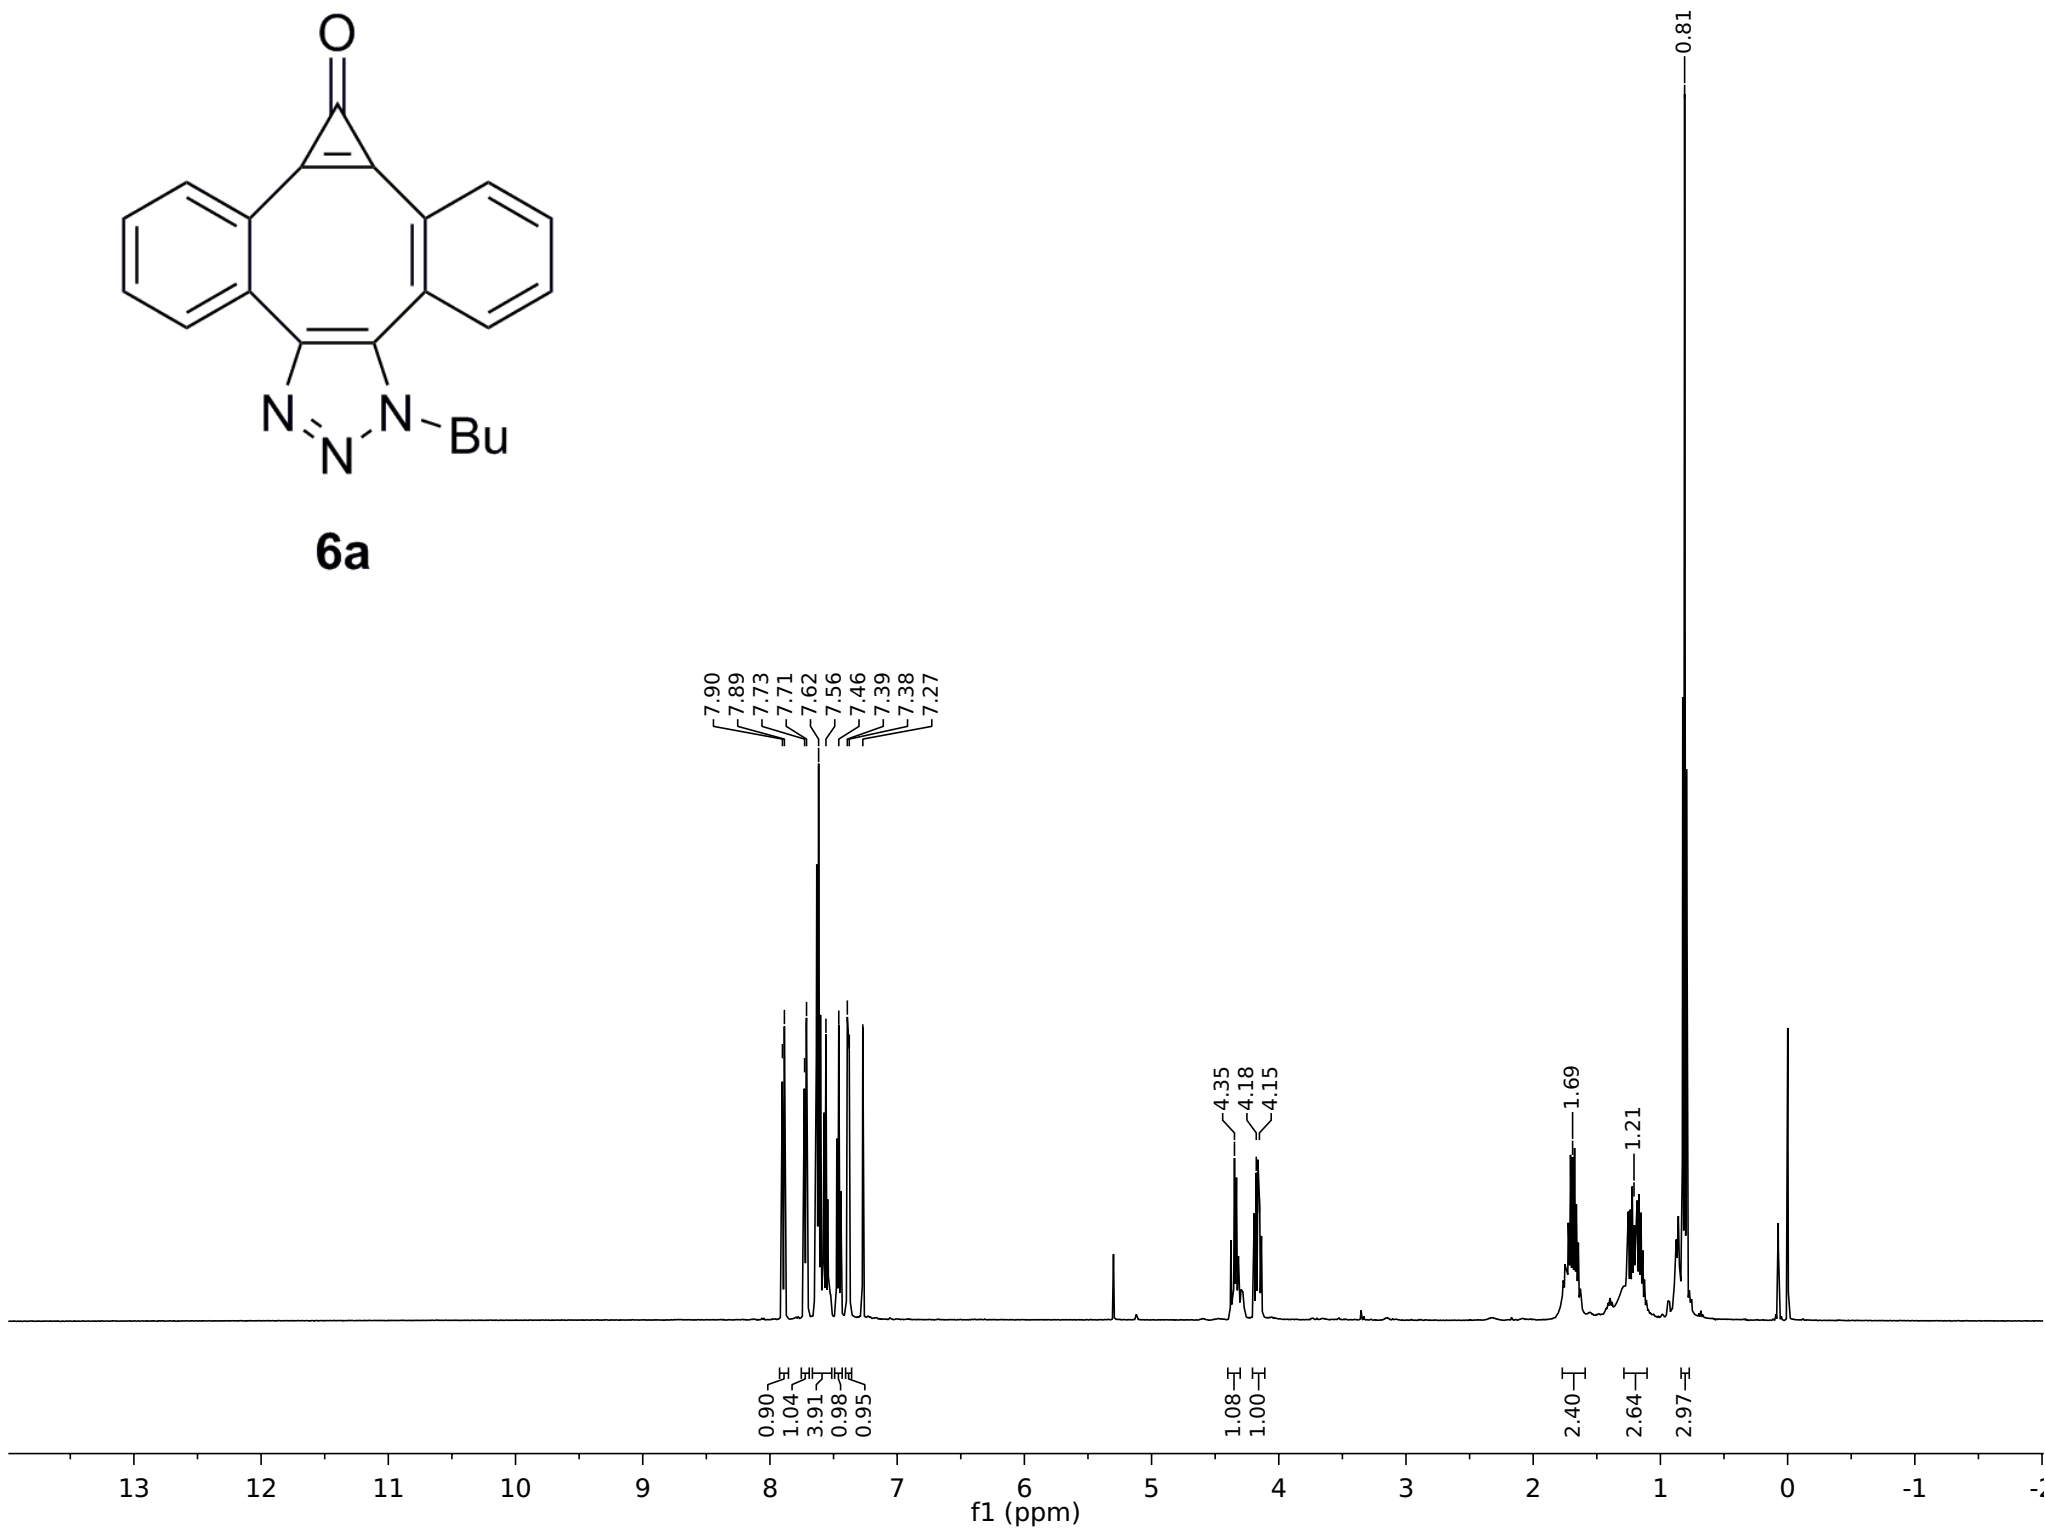

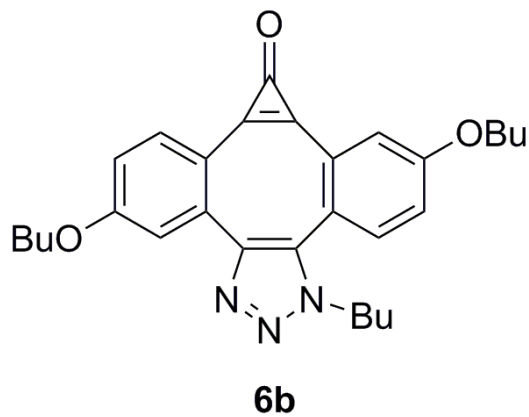

+

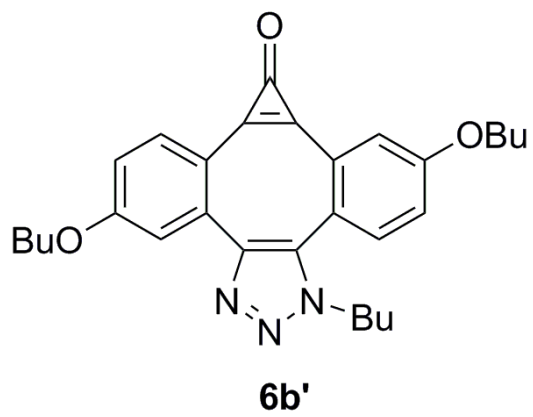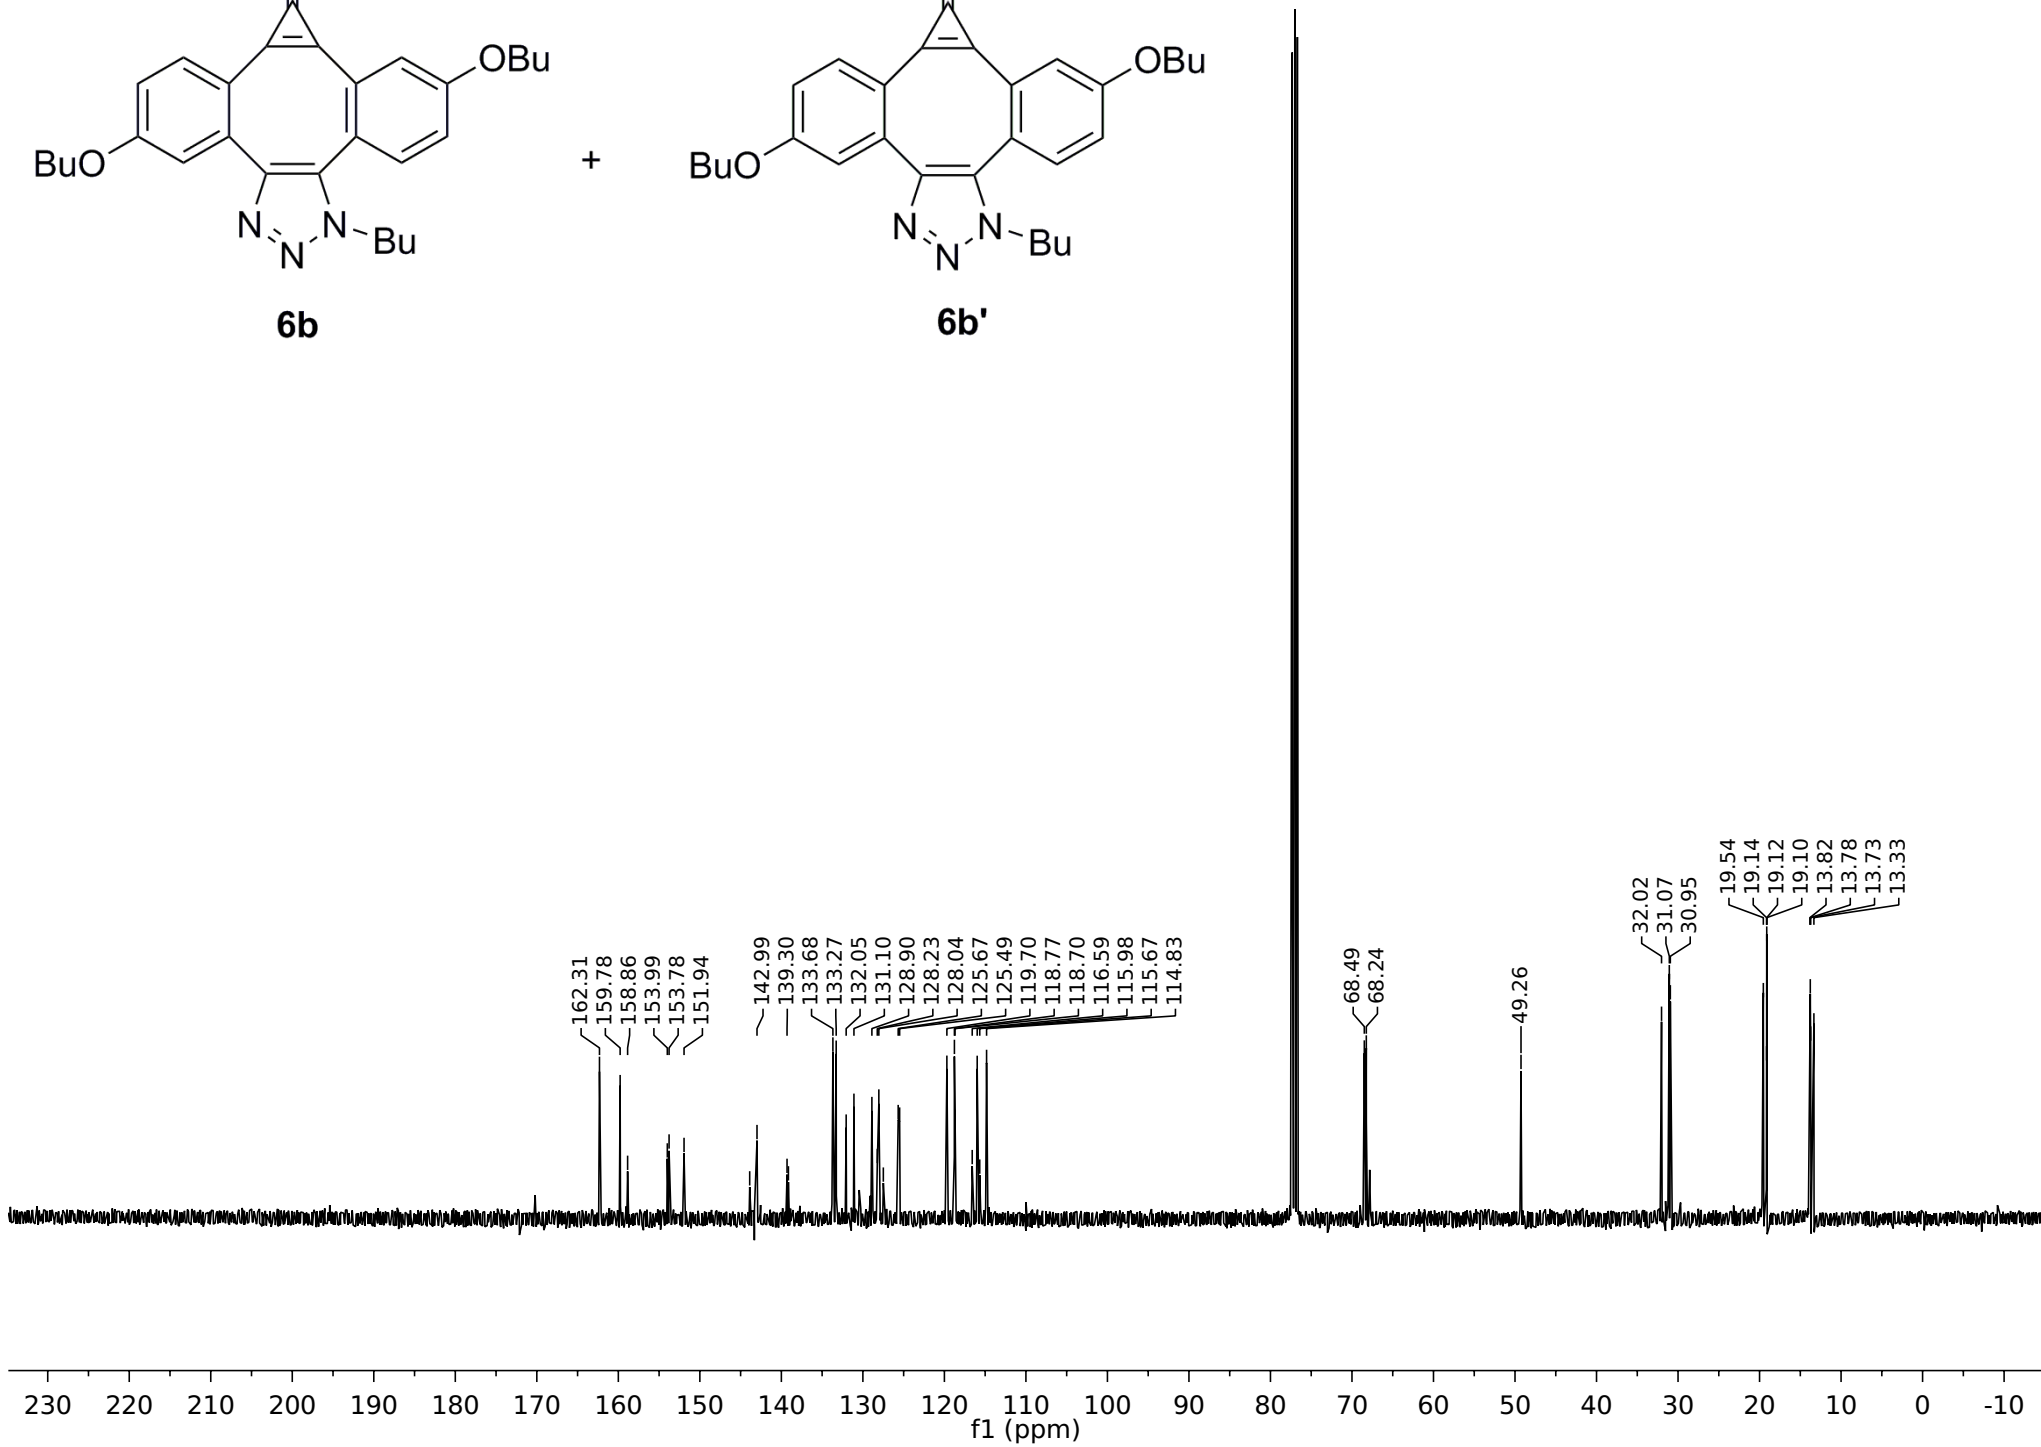

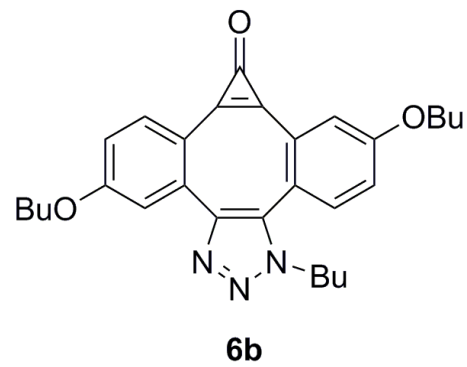

+

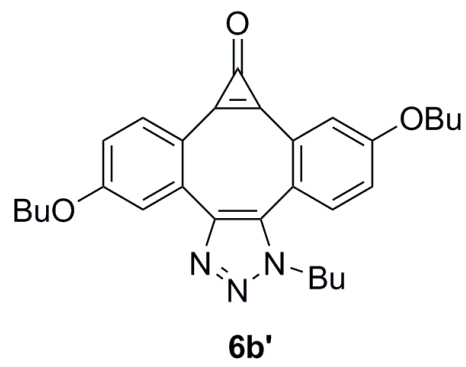

7.76  
7.74  
7.65  
7.63  
7.44  
7.26  
7.10  
7.08  
7.01  
6.98  
6.88  
6.80

1.20  
0.97  
0.97  
0.81

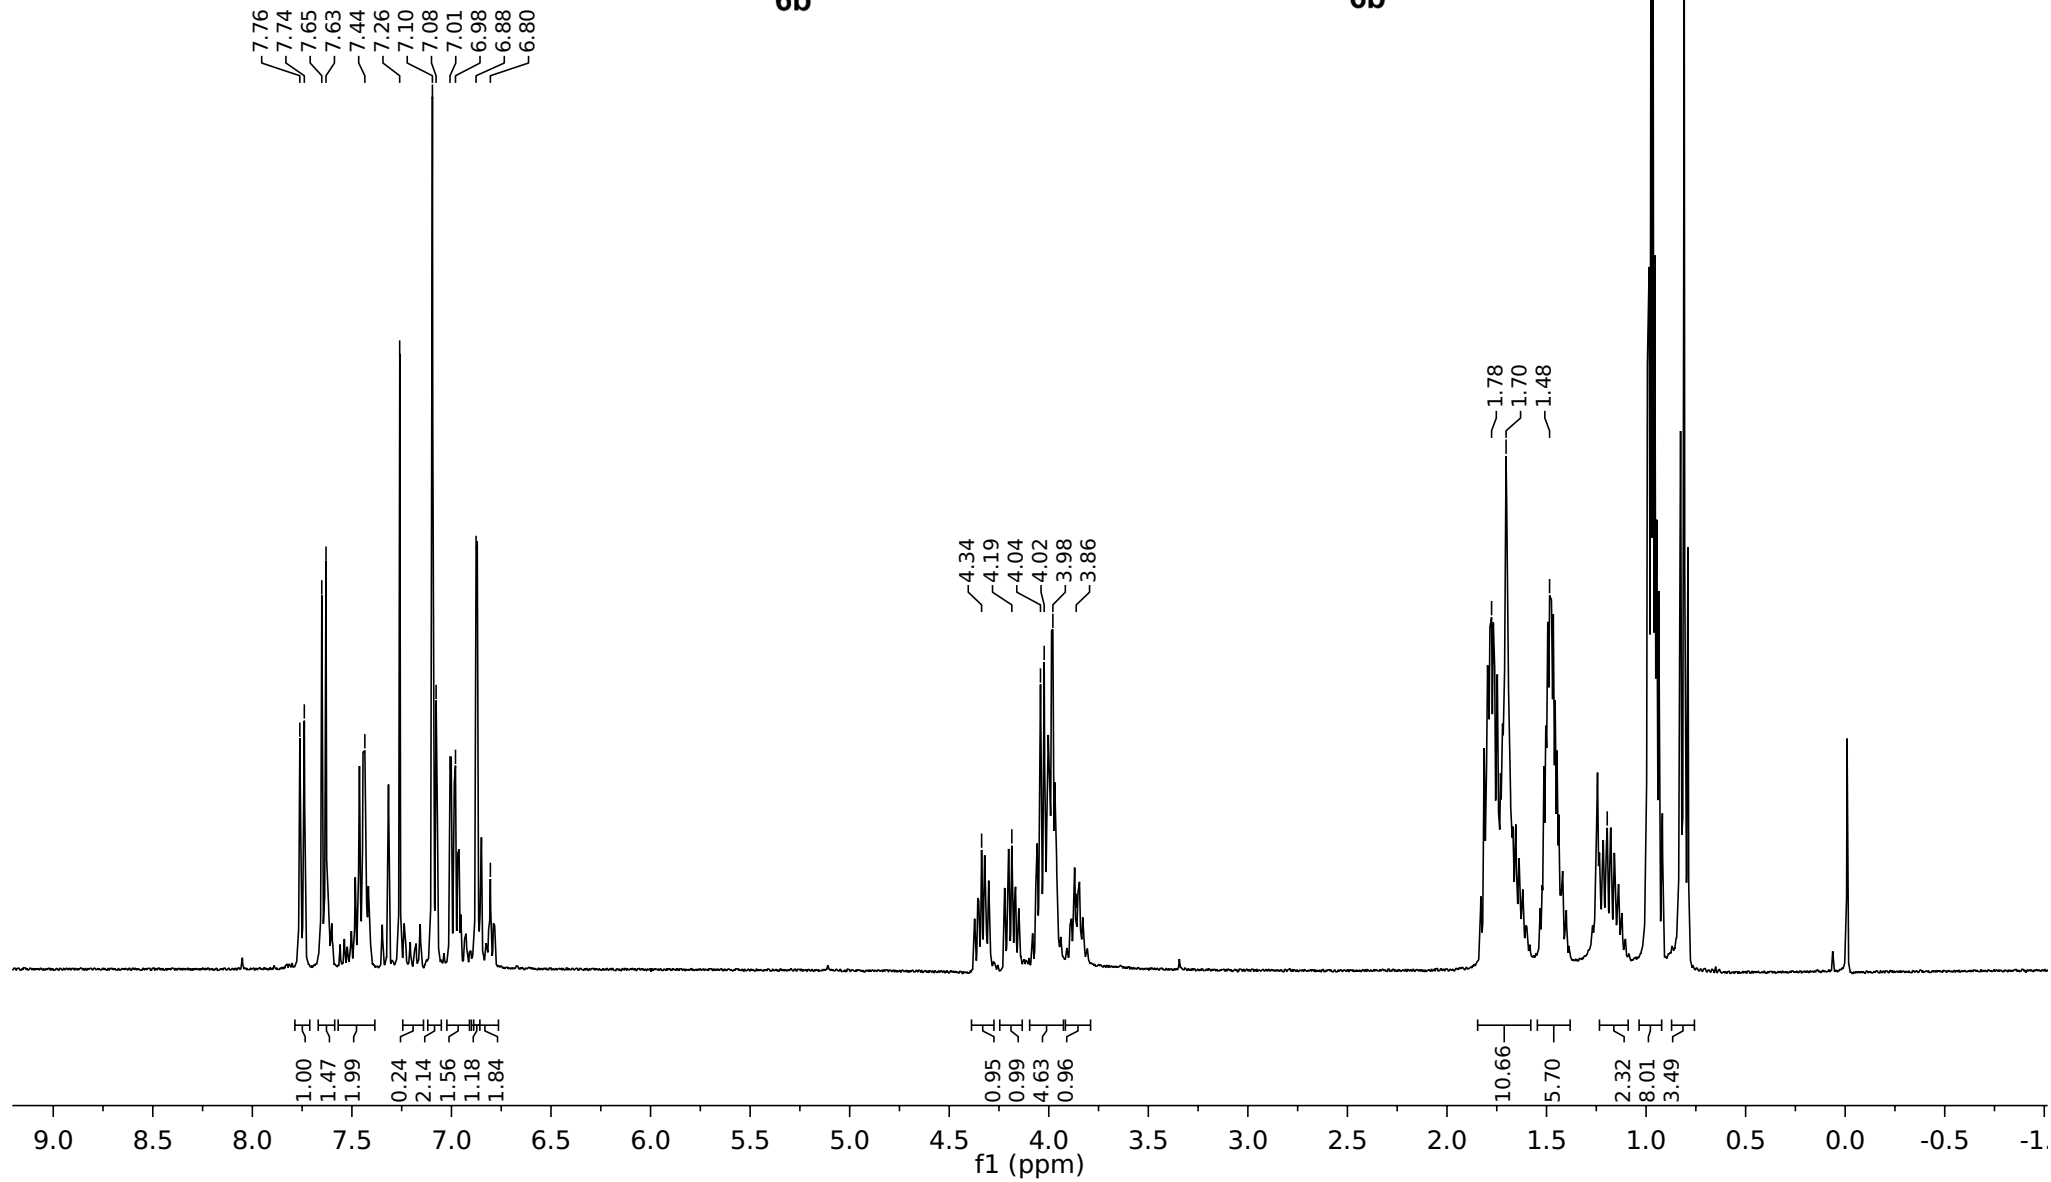

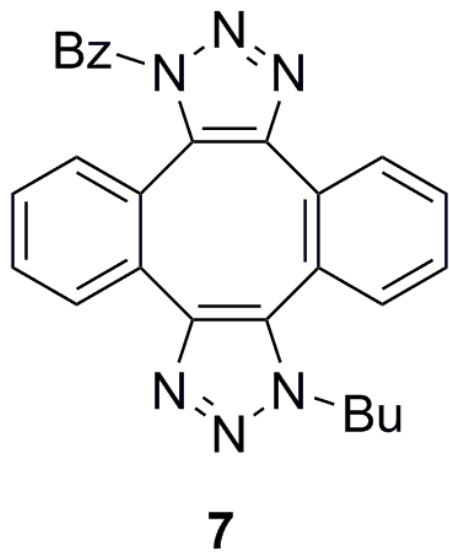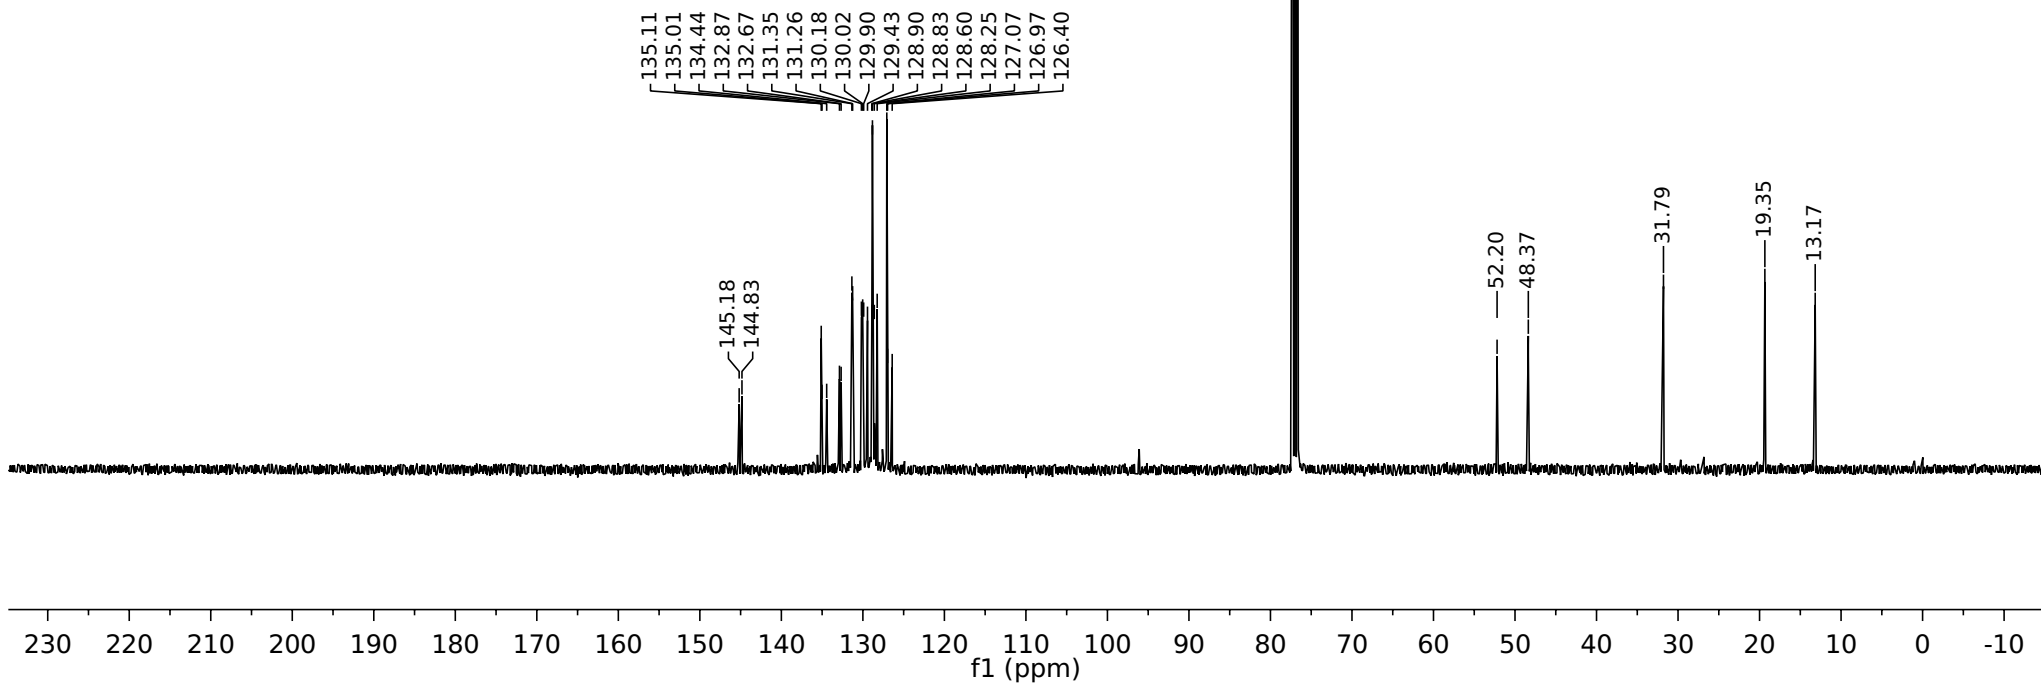

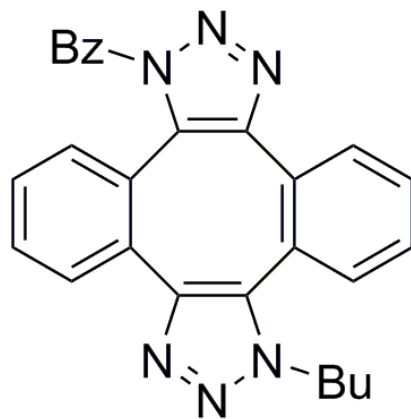

7

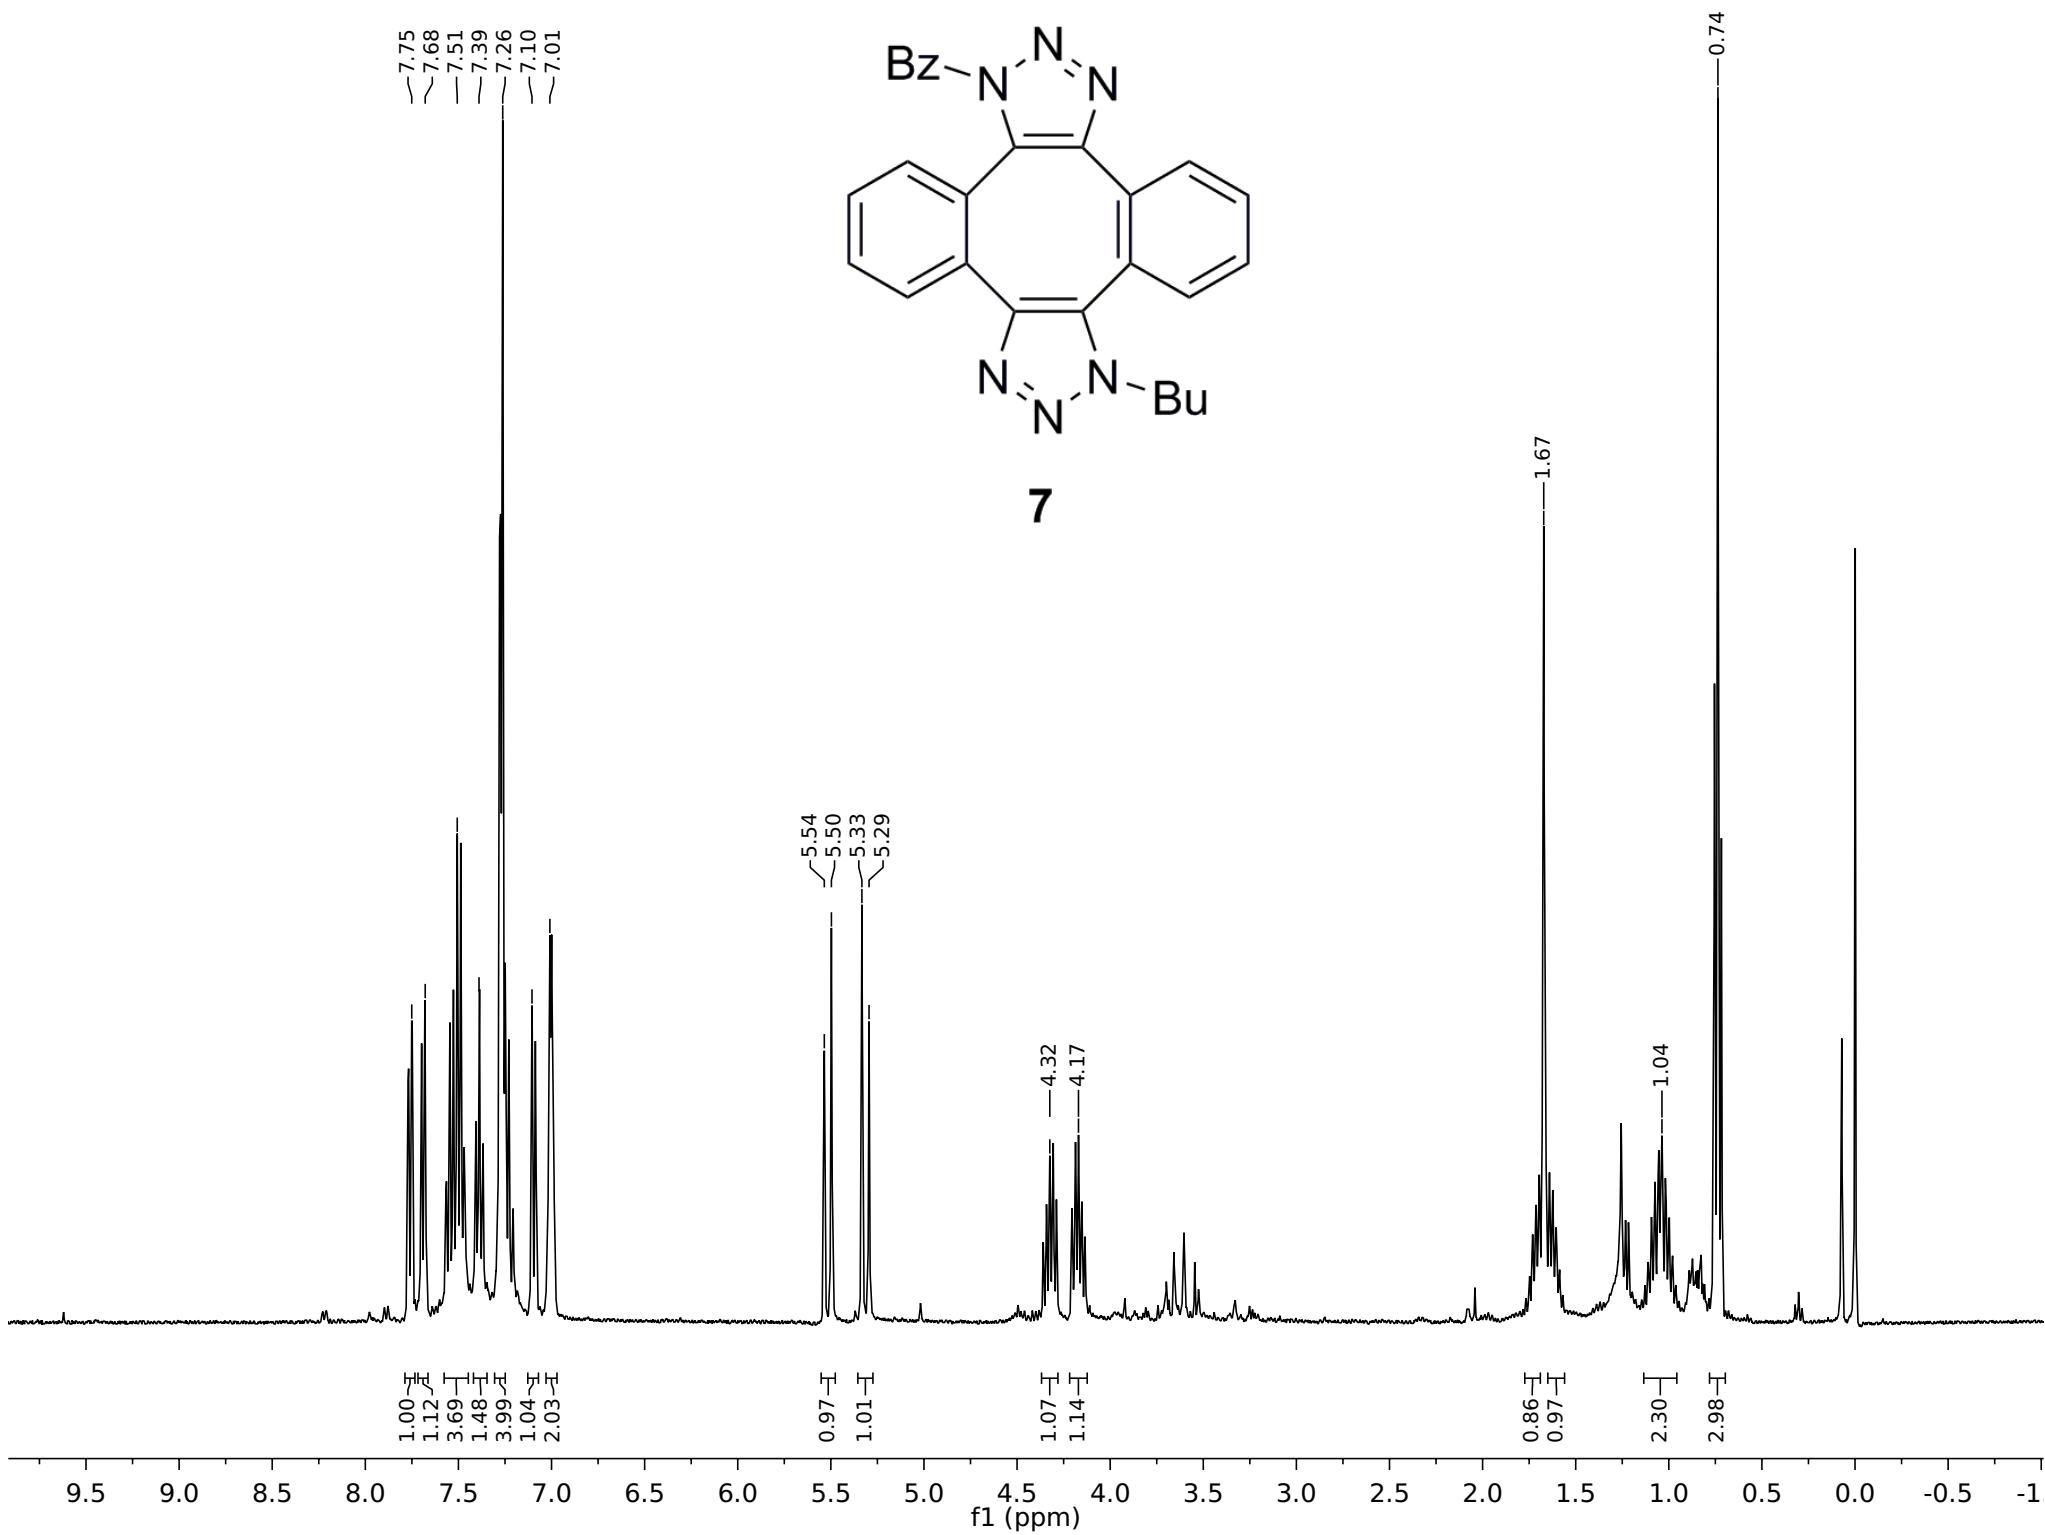

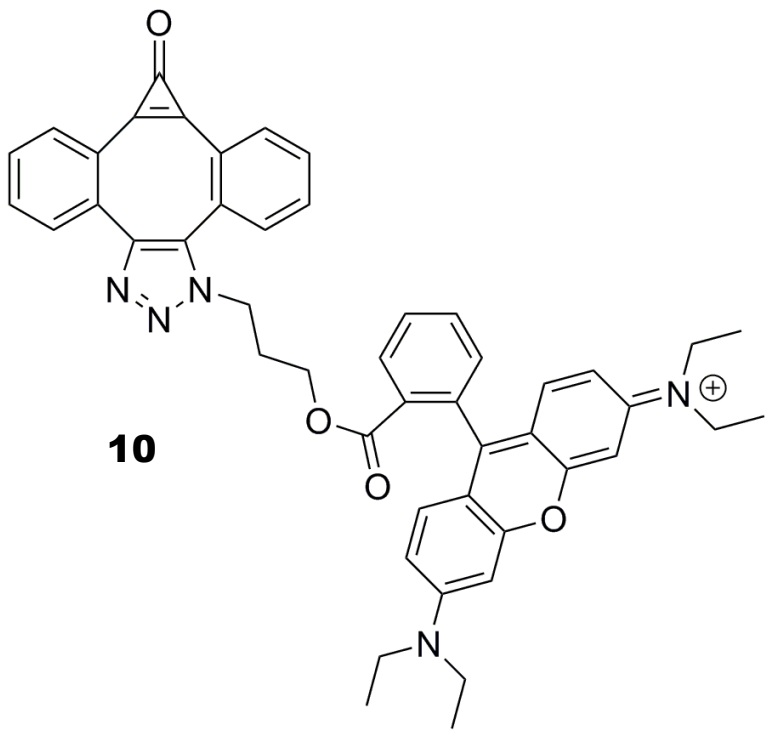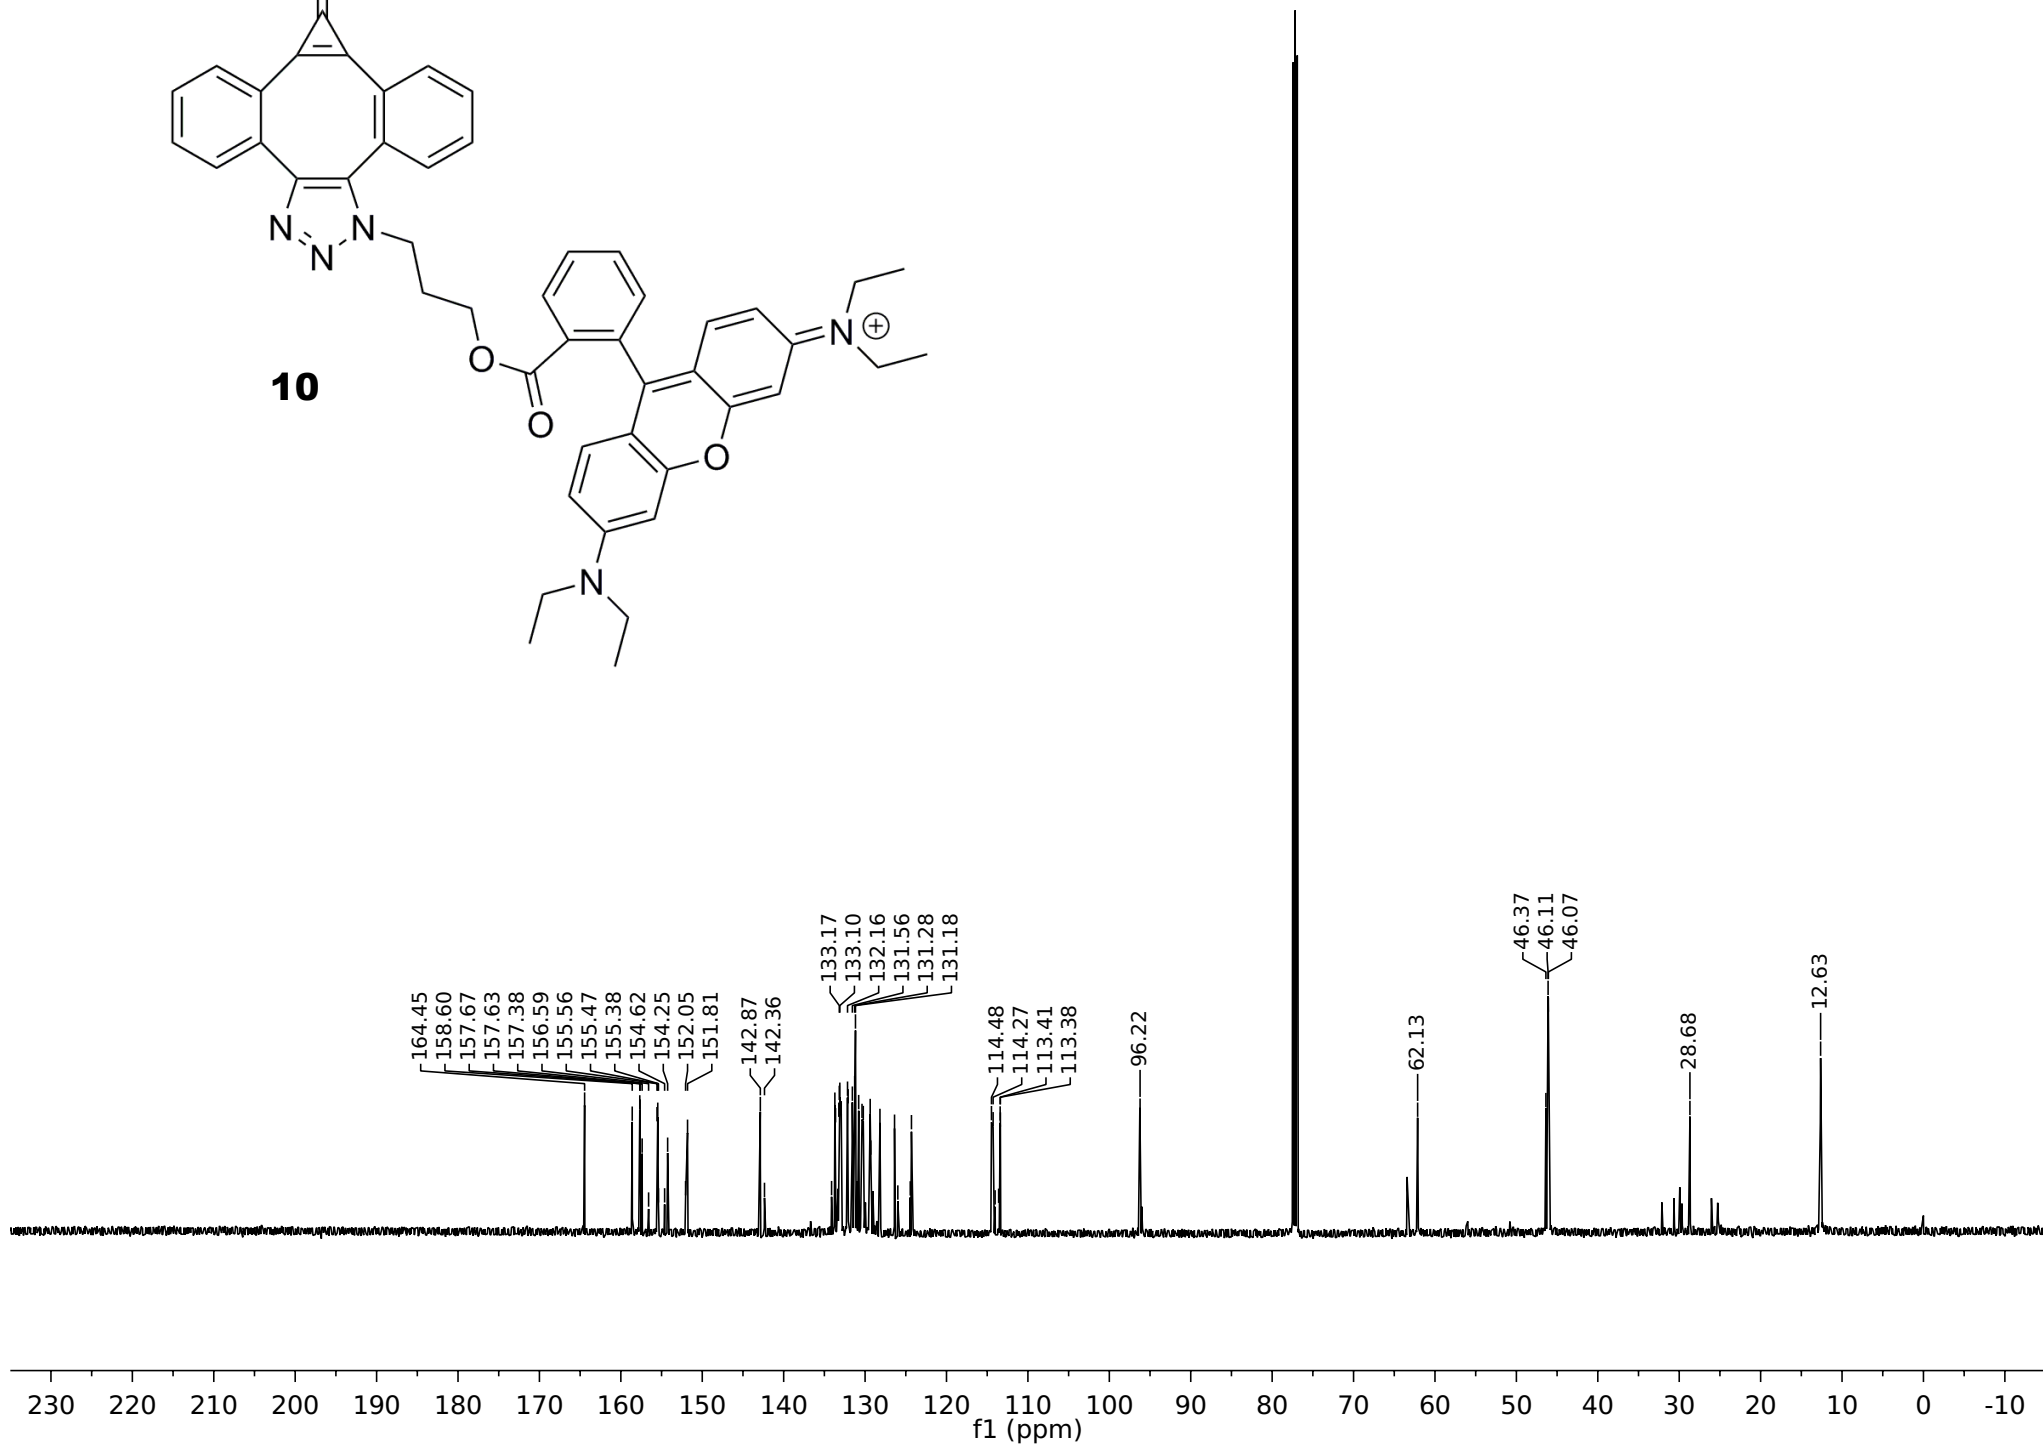



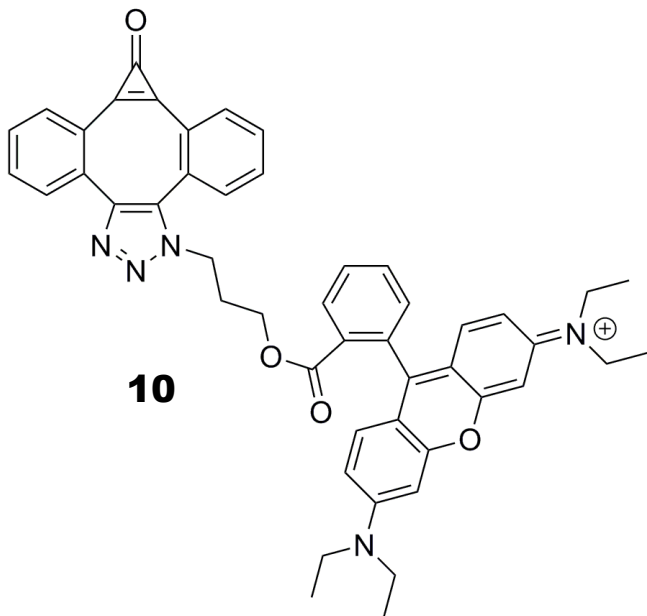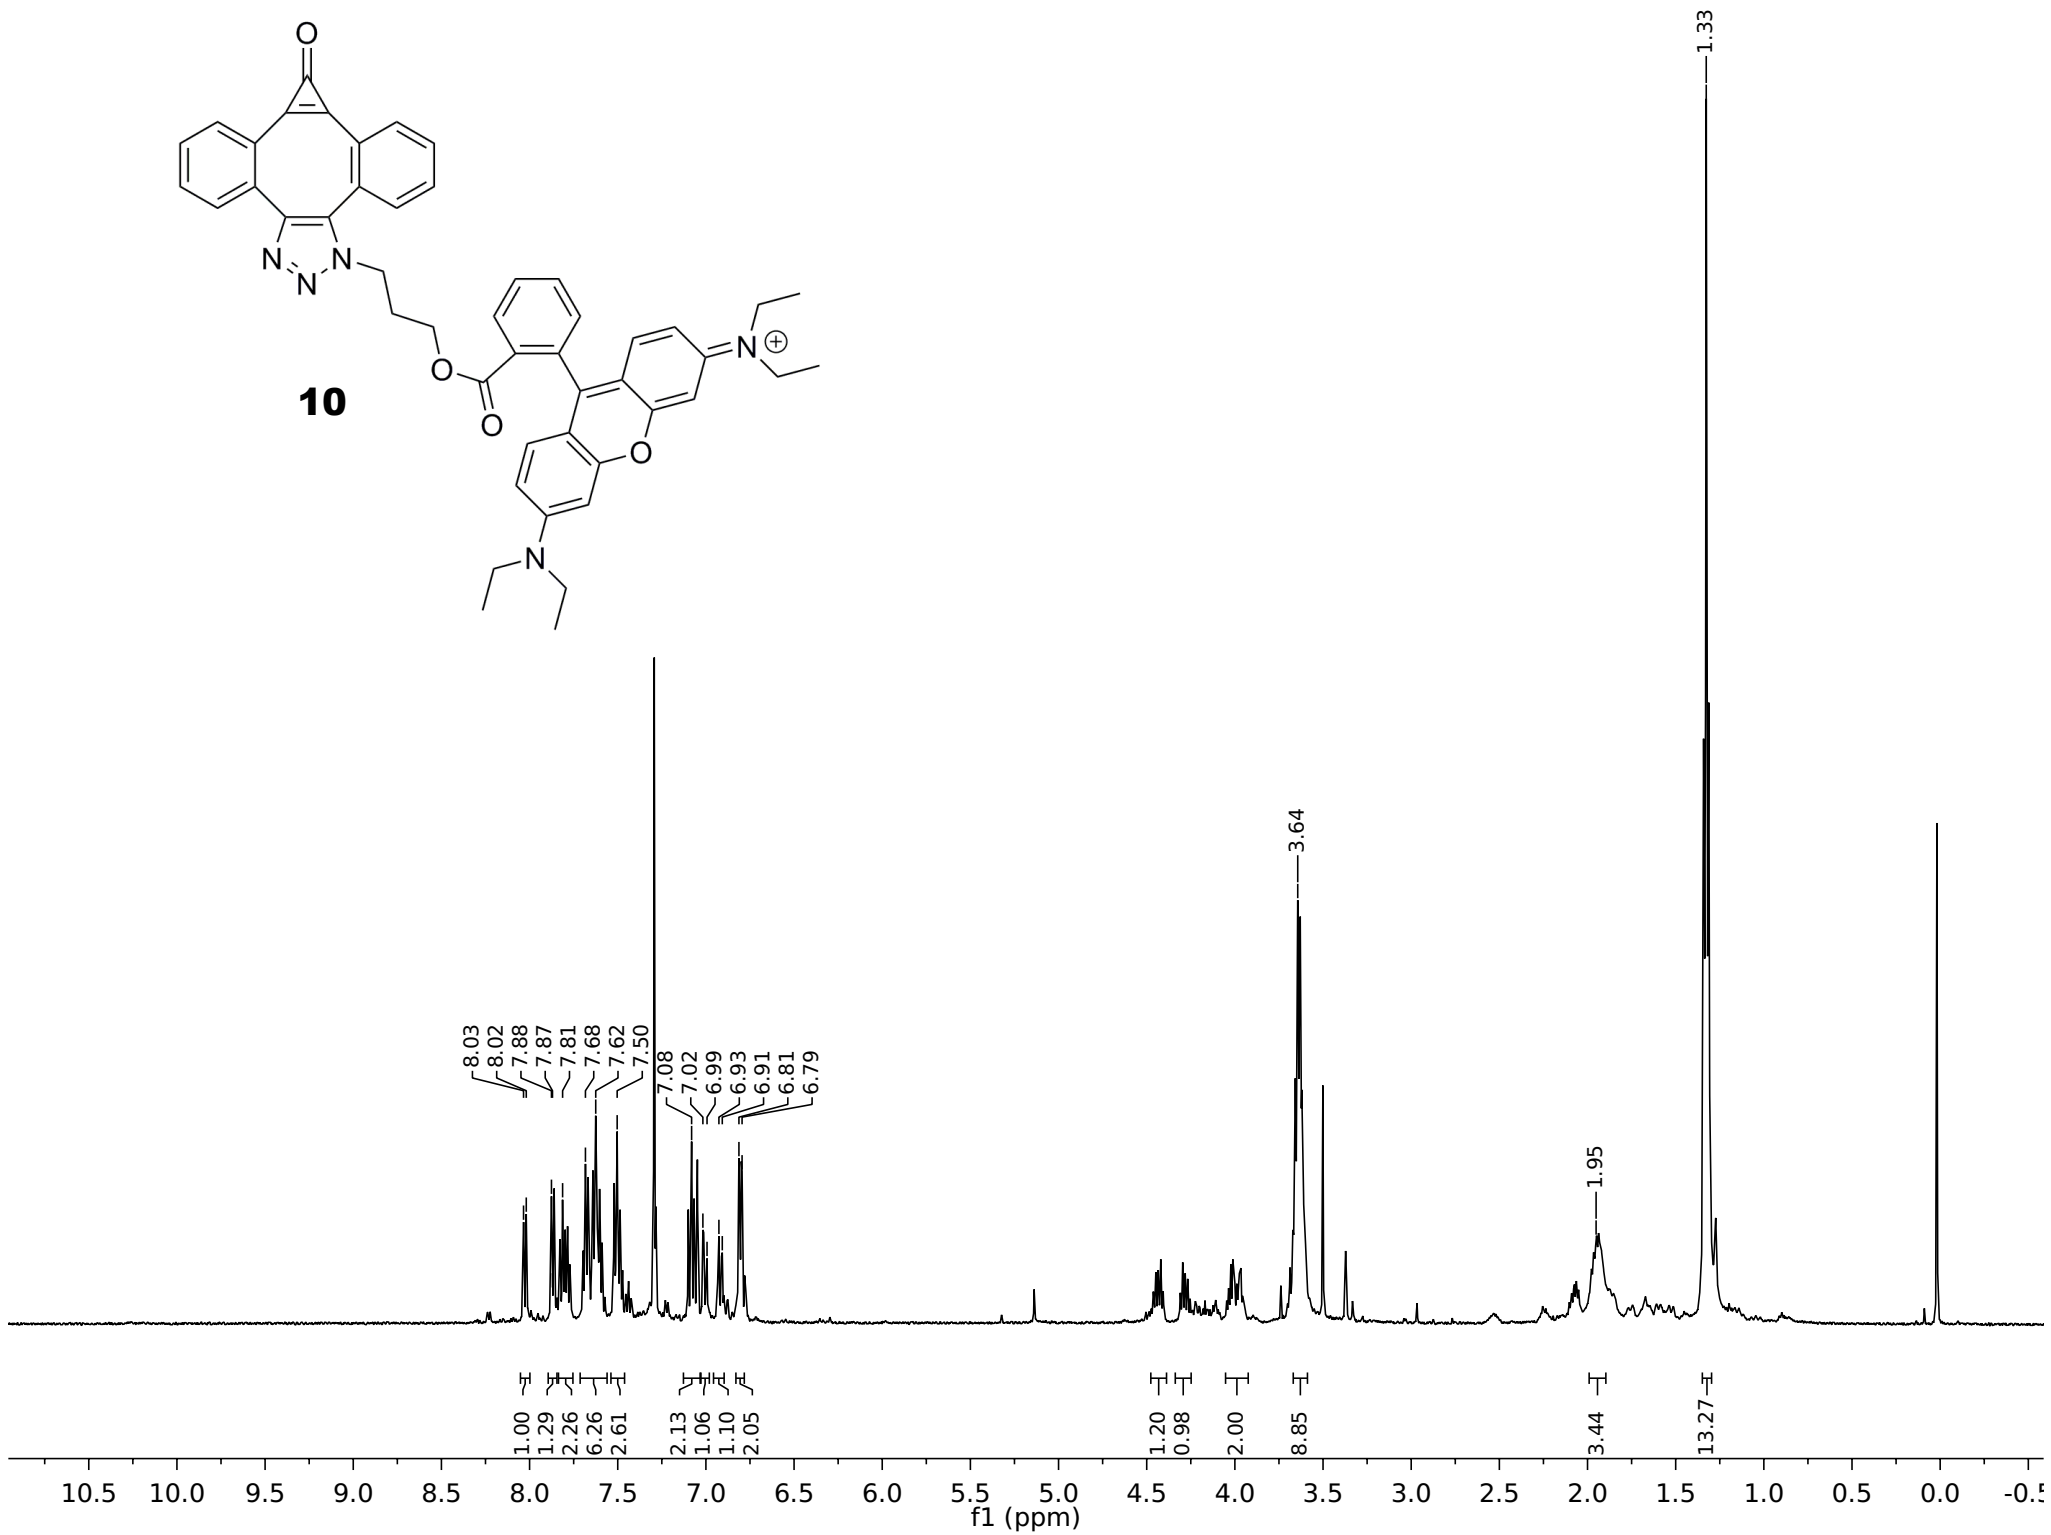

Supplement: NIHMS967564-supplement-SI.pdf [file NIHMS967564-supplement-SI.pdf]
